# Supplementary material for: Voltage-Gated Proton Channels in the Tree of Life
Source: MDPI journal article supplement (doi:10.3390/biom13071035), 2023-06-24
Supplement: s1 [file s1]

## Supplementary material

Figure S1: Tree of life

### Opisthokonta - Animalia - Vertebrata

Eukaryota; Metazoa; Chordata; Craniata; Vertebrata; Euteleostomi; Mammalia; Eutheria; Euarchontoglires; Primates; Haplorrhini; Catarrhini; Hominidae; Homo.

**Homo sapiens hydrogen voltage gated channel 1 (HVCN1), transcript variant 1, mRNA. NM\_001040107**

MATWDEKAVTRRAKVAPAERMSKFLRHFTVVGDDYHAWNINYKKWENEEE  
EEEEEQPPPTPVSGEEGRAAPDVAPAPGPAPRAPLDFRGMLRKLFSSHR  
FQV<sup>II</sup>ICLVVL<sup>D</sup>ALLVLAELILD<sup>L</sup>KII<sup>Q</sup>PDKNYAAMVFHYMSITILVFF  
MMEIIFKLFVFRLEFFHHKFEILDAVVVVVSFILDIVLLFQEHQFEALGL  
LILL<sup>L</sup>LRVAR<sup>I</sup>INGIISV<sup>K</sup>TRSERQLRLKQMNVLAAKIQHLEFSCS  
EKEQEIERLNKLLRQHGLLGEVN-

**voltage-gated hydrogen channel 1 [Xenopus laevis].  
XP\_018099695**

MAGCLRHF<sup>T</sup>SVGDDTKKREWKEEDVEVAHEEEKKNTPHPF<sup>I</sup>ASYS<sup>L</sup>RGAL  
KWL<sup>F</sup>SSHKFQ<sup>I</sup>VI<sup>I</sup>SLVIL<sup>D</sup>ALFVLVEVLLDLELLAEKVDHI<sup>I</sup>PE<sup>I</sup>FHYL  
SVSVLSFFILEIA<sup>G</sup>KLYAFRLEFFHHKFEVFDAAIVVISFIIDIVYISRE  
DIFNA<sup>V</sup>GLLILL<sup>L</sup>LRVAR<sup>I</sup>IVNGVIVSVK<sup>S</sup>RAEEKIHKLEENQRSLL<sup>E</sup>KV  
TQLEQQSAQQEQEIARLQKLLKQHNVPDS-

**voltage-gated hydrogen channel 1 isoform X1 [Xenopus laevis].  
XP\_018104580**

MAGCLRHF<sup>T</sup>SVGDDTKKREWQEDVEVAYEEPLKNTPHPF<sup>I</sup>ASYS<sup>F</sup>RGAL  
KWL<sup>L</sup>SSHKFQ<sup>I</sup>VI<sup>I</sup>CLVIL<sup>D</sup>ALFVLVEVLLDLELLAEKVDHI<sup>I</sup>PE<sup>I</sup>FHYL  
SISVLTFFILEIA<sup>G</sup>KLYAFRLEFFHHKFEVFDAAIVVISFIIDIVYISRE  
DIFNA<sup>V</sup>GLLILL<sup>L</sup>LRVAR<sup>I</sup>IVNGVIVSVK<sup>T</sup>RAEEKMHKLKEQKGSLL<sup>E</sup>KV  
AQLEQQCAQQEQEIGRLHKLLQEHNVFPAS-

Pan troglodytes XM\_016924207  
Macaca mulatta XM\_028829869  
Balaenoptera musculus XM\_036823351  
Mus musculus NM\_028752  
Rattus norvegicus XM\_017598517  
Danio rerio NM\_001002346  
Lacerta agilis XM\_033159246  
Gekko japonicus XM\_015415738  
Microcaecilia unicolor XM\_030220075  
Petromyzon marinus XM\_032947247

## Opisthokonta - Chordata - Tunicata

Eukaryota; Metazoa; **Chordata**; **Tunicata**; Ascidiacea; Phlebobranchia; Cionidae; Ciona.

**Ciona intestinalis voltage-gated hydrogen channel 1 (hvcn1), mRNA.**  
**NM\_001078469**

MEGDNCNKSRHKSHNMINPNYASVRCTQPLPSVIQLRSRNKMIGITEDPS  
SDSEPVSSNQPLLLTNLSYEVHTFNDNNNHERPAPQEQSTQNTMISMQSE  
QKSDRFTASNLGMFQYMKFEIGEDGDDHEEEAILTNREKLRHILHSKIP  
VAIIIVLVVLDSFLVVGELLIDLKVIIVPHGNPAPEILHGFSLSILSIFMV  
EIALKIIADHRHFIHHKVEVLDAVVVISFGVDIALIFVGESEALAAIGL  
LVILFLWRVFRINGIIVTVKTKADDRVHEIKKKNSELELQIHNLEEKLS  
QKEQDMSRLHEILRCNNIDIPPTVPLTTSVQIHSTTTASADV-

**Ciona intestinalis voltage-sensor containing phosphatase (vsp),**  
**mRNA. NM\_001033826**

MEGFDGSDFSPPADLVGVDGAVMRNVVDVTINGDVTAPPKAAPRKSESVK  
KVHWNVDVQGPSEKPETRQEERIDIPEISGLWWGENEHGVDDGRMEIPTT  
GVGRVQFRVRAVIDHLMGRVFGVFLIFLDIILMIIDLSIPGKSESSQSFY  
DGMALALSCYFMLDLGLRIFAYGPKNFFTNPWEVADGLIIVVTFVVTIFY  
TVLDEYVQETGADGLGRLVVLAFLLVVFLAIFYSHQMKASSRRTISQ  
NKRRYRKDGFDLDTYVTDHVIAMSFSSGRQSLFRNPIGEVSRRFFKTKH  
PDKFRIYNLCSERGYDETKFDNHVYRVMIDDHNVPTLVDLLKFIDDAKVW  
MTSDPDHVIAIHCKGGKGRGTGLVSSWLLEDGKFDTAKEALEYFGSRRTD  
FEVGDFVQGVETASQIRYVGYFEKIKKNYGGQLPPMKKLKVTGVTITAIQ  
GVGRNGSDLSMQIVSERQEVLLCKFAEGYNALQYDATDDCVTCEVKNC  
PVLAGDIKVRFMSTSKSLPRGYDNCPFYFWFNTSLVEGDHVTLKREEIDN  
PHKKKTWKIYRDNFTVKLTFSDAEDI-

Polycarpa mytiligera GIUT01151021  
Salpa thompsoni GFCC01108773  
Oikopleura dioica GCJN01019160  
Phallusia mammillata LR785897  
Aplidium turbinatum OU964926  
Ascidia mentula OX387201  
Styela clava XM\_039415523  
Clavelina lepadiformis OX392441

**Oikopleura dioica comp23289\_c0\_seq2 transcribed RNA sequence.**  
**ACCESSION GCJN01027812**

MSENSSVVESTPFLEILKSDMTCWEKTSRVVHKLLHSHTTQAILLFLVLV  
DCAVIACEIVFDEKVKTHNDYCGANSTLCQEEIDNEQTKKWKKIYKALYY  
TSLTLLSVFVVEFILKIVFSAKKFLKSWVHIFDALIVISSWILMLIMLNK  
DVKNGMIAEFLIABVILIHGMKEALEEANELLHENMEEIHALKAENN  
KLKEELLAVKDR-

Oikopleura dioica TRINITY\_DN2869\_c0\_g1\_i1, transcribed RNA  
sequence. GKAI01006710

MDNRISKFFSSDTEAYLERTPVTISEKIAHFLHSSTCHLIVIVLVLVDC  
FVLTELIFDGKLDTYAEYCDPTPSCSEQSHKLHHWEHVTHVIHICSIIVL  
TIFMIEVILKVIYTREHFFSHKIEMIDGVVVLLSWILDLIMLNPNLVGKW  
AEFIIIFRFLKINGMILSAKQAADKRVHEQKRKVQELEKELVDLKKQYE  
TQNNQ-

**Opisthokonta - Animalia - Cephalochordata**

**Eukaryota; Metazoa; Chordata; Cephalochordata; Leptocardii;  
Amphioxiformes; Branchiostomidae; Branchiostoma.**

**Branchiostoma belcheri voltage-gated hydrogen channel 1-like  
(LOC109464640), transcript variant X1, misc\_RNA. XR\_002139895**

MDKLKNAFKFELFQNDSSSVITSSDATSSSGNAEPKTFREKLLHVLHST  
EFQVAVVILVIVDCILVVFELLIDLGGIKLCEEAVRAECESAGTTATMTP  
AEEAEKEAECDHPEILHYMSIAILTIIFLIEIMFKVYAYQKDYLKHKME  
LFDADVVIISFCFDVAYANHEDAFDGIQLLVVLRLWRVTIINGILMSVQ  
HTAEKKINAHKQARQEVQEELNKMIAHAHDLEKEIDLLRKTLRENGISVE  
SIPRTPEVSSSQVKVEAEITPTTEYATPAHFSAFSGQDDTQA-

**Branchiostoma belcheri uncharacterized LOC109463761  
(LOC109463761), mRNA. XM\_019760615**

MTPCDGEKKPPPSGEATVGGIFPDEIAVIKKQAQNDKRRPLKIVIIAGVA  
VMAVLAIGVLLITRPSRHGVVTCSLNFWTGKQLLHETVETDKDAETDAF  
YTEGSRGEAAVMDHSSMMKAFKLSRSNKTCFIFEETQGEKNAVKKTAEE  
LEEKQDGSLLQFAEYGGAMLMTVDTERPARPVLSQKLQNFCCGLEPRWAKL  
TPATEEEQQGDRVEIIMPAEARDMGELAEMPVGPNGEKETPPTPSSTHPL  
TESRDHHHDNQDCRHKLKHMLERQSVHIAIVVLIVLDTLIVIMELLIDVR  
VIKLCPPDPDVCVPKAGHNGTTGLVTTGAPGHHVIDAGDHGTGGHEECHH  
VLIEVLHVVSILILCIFVVEIALKIYVDRLEFFKNGFHVLDADVVLVSLG  
LDIASLVRPSTFTDAGLLILLLWRITRIVNGIIISVEEEWEHKVNHLK  
HEHQLVERERDRLLKENALLQKTLTNHGIDIPKLPPDSGDESTCEFEFE-

**Branchiostoma belcheri uncharacterized LOC109467017  
(LOC109467017), transcript variant X1, mRNA. XM\_019764911**

MPRFKGQQQHETCRHLAVEDVMVADELGLGMSSADLYNRNVEGDFLDLE  
AAIFCDIEEEKTKQVRVQQLLDGPATQITIVLTSWLLSHVLLLFLVLDLS  
AIFHHDKMVARIHVVGLGVLSVFTVEVLTRLVCHQMQFFDKKIEVLDL  
AVVIIACVPMIVVSVELAPSTAWDGFSLVILRIWRCYRVVQGCVSPVRE  
EASRKVHVLLQAQRRRAHQELQTLYLMHDENQEEIHRLRLLLGRREAEEDN  
VSQQLQVALERKDSQYVAQLIHTIEQRQGRNKGRQRDGGDRDSPYSTIVVH  
AHQLSDSNDVPSGTIASRLSESTTGDSGICEETRPQQQTNDSESRNHANS  
GVTQLPKCGQQALTVEPRGSHQQHSNRSPCSNSKRNPVSSCDMDRIDV  
IGSEIILQHRNDSTGKKFLDGKLPSNKDSRLLFRDNKSMPSNGKVSHSKN  
KVSEIKVNKSLDDDHKKAVSMDNKTVSKNNTATAQTNGKVRKGKKKAGSG  
DSYVNGALLLEMTLQQKGDTGYCNEIVIEQFYQNGNAPATAL-

Asymmetron lucayanum GETC01094801 GETC01046531  
Branchiostoma lanceolatum JT904261  
Branchiostoma floridae GESZ01013291

**Opisthokonta - Animalia - Hemichordata**

**Eukaryota; Metazoa; Hemichordata; Enteropneusta; Harrimaniidae; Saccoglossus.**

**Saccoglossus kowalevskii voltage-gated hydrogen channel 1-like (LOC100367669), mRNA. XM\_002734179**

MWNFSKIHVPYIRNSCDCFSYHHYHKMDGFGFKRMQESKQDGQLRVITK  
DDTSDSLASDSQDEATKKEFNNGFRGTCLAVMNHHCQVAIVVLVILDVIF  
VLAALVLDQMSTPDCGNSTETQEFEEENTASAVLHYCSLTILSLFMIEI  
SLRIYCMRLEFFKHKLEVFDVAVIVIIISFSFDVAYAISPDTFHDILGLLVI  
FRLWVVRIFNGVLISVKNQNEKKLAAQRRKCSELEQELEKFRQYCTVQE  
NEIELLRDELKKHGITLEAEKKERPQSLTQVDVIVEVNKVNEKTIESLD  
RKDFKEDIDAVDYSVTPDPPSTETDKSPTRSTSSTIPESPQEPDYGSNC-

**Saccoglossus kowalevskii voltage-gated hydrogen channel 1-like (LOC102802600), mRNA. XM\_006812030**

MAADEESHQGPVTIVRDGFENRSSTPRSFSTPDLITATHRRRPRPKYCMA  
MERFINSVIVQVIILLMVVLICLIATTETLVAYRRLKFDSSSKTAE TVITV  
LHYVCLFFFIVFVFEVIFRICAMGVEYFHQPMQIVDGLVVFLTFTLDVSL  
WLAPVSHPALHTLSFLIII-MG-LHLIIKGITDRVREDADVQIELERIMR  
RNIEACADKLQQQCDQQNKEIAFLKDLLQQHHIESLQSNQSVIHTDSETL  
KKAESSSSSTAGTIDGSPIDKRKCSVDNIAVTNDHYATATSTAILQSAMD  
DVINRSQNIENIEKDKDEVKTSQDNQNITIIETPATPLKECKAVSVSMP  
QIGTAANPPIRYEDLDTLNLELAEIRRLSQEALLQDFTTPLEGINNNNIE  
SIAIE-

Ptychodera flava GDGM01225783

**Opisthokonta - Animalia - Arthropoda - Insecta**

**Eukaryota; Metazoa; Ecdysozoa; Arthropoda; Hexapoda; Insecta;  
Zygentoma; Nicoletiidae; Nicoletia.**

**Nicoletia phytophila proton channel mRNA, complete cds.  
KT780722**

MWLKMDAHKRLSEDLEKVIMKEDGNSSIMTEPDHNIQPSKTVRERLRKLL  
HSHKFQISVITLVIIDCLLVITELLIDLEMHEEESLAQHVLHYCSITILS  
IFIVEIFLKLYAFRQEFFKHRLEVFDAIIVIVSFALDIAFRNSRDALSGV  
GLIIILRLWVAFLNGVVLVSKMQAEHQLEREKQRGMALEGELSRCRQV  
CAAQQRELDVLRVAVLQHHGLDQQLPDGNRVDVVADVEKR-

Extatosoma tiaratum GAWG01024136  
Aposthonia japonica GAWU01255994  
Peruphasma schultei GAWJ01019192  
Aretaon asperimus GAWC01068486  
Medauroidea extradentata GAWD01057497  
Ramulus artemis GAWF01048256  
Sipyloidea sipylus GAWF01047109  
Clitarchus hookeri GFVY01085196

**Opisthokonta - Animalia - Arthropoda - Chelicerata**  
**Eukaryota; Metazoa; Ecdysozoa; Arthropoda; Chelicerata;**  
**Merostomata; Xiphosura; Limulidae; Limulus.**

**Limulus polyphemus voltage-gated hydrogen channel 1-like**  
**(LOC106464594), transcript variant X1, mRNA. XM\_013924749**

MEDTTEKTDGDSIATNLESDPDIQPLITFRERLTKLLHSYKFQVGVITL  
VIVDCLLVISELLVDNLISVNSHSSAPHVLHYLSISILSLFIIIEIGAKL  
YAFRLFFHHKLELFDAVIVLVSFALDITFRDKESAVSGVGLLIILRLWR  
VARVLNGIVLSVKTQADHKLAKQKKRENLEQELARSRDYIAALEEEVET  
LRRILKDNNIKELPPTVIDNGAFKCTTLNVVAEVNHMIT-

**Limulus polyphemus transmembrane protein 266-like**  
**(LOC106463214), mRNA. XM\_022390662**

MRNSDPLVWGLTGDTSLDDDGPTRLCEKIWATVNGKVFSAVIVTLVFEVFG  
LVIFSELLIDFEVVDQPQWKTSLNCSANVSGLVFSSAGANSPKLMAKDI  
LSYISIVILIIIFVFEVGFRLVSGRARYLIQGMETCDIAIVVLVAFGLDIAF  
LTPPSKKGAGKEAAVLIILLRLWRILKRIQSVINDNTRLEMGHFLSICERE  
KIQAEHKVDILILKVEDLEHEVAYLKEKLKKTEKESLYAKRQRKKDGYSS  
TQHKHPTITIGVETSPARHPCTGTQTAIVICEQHIPEEKVTKEQVMDMRT  
FADVTSTRIIADALCMVTGNPNQFLRSPTTGGSTVKDGTTSHCRIAGDFE  
SGYISNVSGITWDKAASRIPTLGTTRTLKCPSSPESGYGSSSSARNPAA  
SSVSPLDTGTETASTSTGSSKHTDTVFLFPDPTGQRREVELGVEMDILEE  
ISEIERVKHIEFDPNKQDQDIPMTSL-

**Limulus polyphemus uncharacterized LOC111087200**  
**(LOC111087200), transcript variant X1, mRNA. XM\_022393049**

MRNFSMFNSKEELMRNSEPLVWSLTGDESLDDDDSTRLCERIWVSVNGK  
VFNAVIVTMVFEVGLVVFSELLIDFEIVQDPHWKTIRNCSANVPALIFPS  
SEAVSPNLRNTKDVLSYISIVILIIIFVFEIGCRLAVGRAKYLIQGIEICD  
AAVVLVAFGLDIAFLTPPSKKGAGKEAAVLIILLRLWRILKRIQSVIDKT  
RVEMGHFLSICEREKAQAEQKVDILILKVEDLEHEVAYLKEKLKKSEKES  
LCAKRQRKKEGYSGIQKHPKITVGVETSPARHPCTGTQTARAICEGFIL  
DEKATKRKVMIDITFAEITATRIIAKALCVASPDGQYVRFLATKDAVGI  
SGTTLCRRIDGSFESGYGSNTSGMTLDKTTNCIPSVGIRRTVKCPSSPE  
SGYGSSSSARNTVATSVSPLDIEMETTSVSTGSKQTDTVFLFPDSANQC  
RKAERGVEMDILEELSEIERIKQVEFDPNKQDEDIPMTSL-

Parasteatoda tepidariorum XR\_001584685 XM\_043048148  
Dermacentor andersoni XM\_050188908 XM\_050168704  
Ixodes scapularis XM\_029987868 XM\_042290414  
Varroa destructor XM\_022812381 XR\_002674557  
Metaseiulus occidentalis XM\_003738312  
Tachypleus gigas GILM01000651  
Carcinoscorpius rotundicauda GILQ01010360  
Piratula clercki IBTM01003006  
Pholcus opilionoides IALF01028455  
Zoropsis spinimana ICQH01009853

**Opisthokonta - Animalia - Arthropoda - Myriapoda**

**Eukaryota; Metazoa; Ecdysozoa; Arthropoda; Myriapoda; Chilopoda; Pleurostigmophora; Scolopendromorpha; Cryptopidae; Scolopocryptops.**

**Scolopocryptops rubiginosus strain wildtype**

**C96881\_a\_4\_0\_1\_1490, transcribed RNA sequence. GCIY01020623**

MENHHKMSDDLERVIMKDDSSSSSVTEEDPQLQQFQTFRERLAHLLHSYK  
FQVAIVGLVILDCLLVIGELLIDLRILEIQEHYDYGAGEADLSICHQVLHY  
MGITILSMFVVEIIAKLYAFRLEFFHHKMEIFDAVVIIVSLSLDLAFLDK  
HNALNGAELIILILFLWRTRILNGIVISVKTQAEHRLHRERRIKEALEQE  
LAKYREYCTEQEQEIEALRGLLRKHGISENEIIESPMTLINQMDVIAEVN  
HTNEQNDKLIA-

**Scolopocryptops rubiginosus strain wildtype**

**s6321\_L\_19063\_0\_a\_4\_4\_1\_1908, transcribed RNA sequence. GCIY01027533**

<YFSLTILSIFIEMLLRIVSGKVQFFKQCMELFDAMVVFAAFSLALSFL  
TTPKDGRNVAIFVVLRLRVKLIVHSVHDTKRQMSHIINAYKRDKIQA  
EHKVELLILKVEDLEHEVAYLKEKLKKTDEKAAQRKKHLRVSSQLAEFPI  
TPQIEKYNPLFHNPILSQRPPPEGRTESPPRDQDVERLERFAECTVKAIL  
RTASNELISKDRWQQKRQSQRRRSAGASDDIHEASSSSSNIIGASSSPTE  
LRQLTDTDGAEGLLSNNSAACFRVAQSSQEELDELSEIERIKKIRFDPTK  
EEKNIPVTAL-

Henia illyrica GESB01025859 GESB01004335

Schendyla carniolensis GESL01004004

Scolopendra cingulata GCAP01021964 GCAP01017169

Lithobius forficatus GCAY01038678

Cryptops iheringi GJOG01009205 GJOG01023410

Strigamia acuminata GESK01000419

Scutigera coleoptrata GCAQ01037316 GCAQ01012485

Polydesmus complanatus GESI01001010

Himantarium gabrielis GCIL01017378 GCIL01018683



**Opisthokonta - Animalia - Arthropoda - Crustacea**

**Eukaryota; Metazoa; Ecdysozoa; Arthropoda; Crustacea; Branchiopoda; Diplostraca; Cladocera; Anomopoda; Daphniidae; Daphnia.**

**Daphnia pulex voltage-gated hydrogen channel 1-like(LOC124207115), mRNA. XM\_046604416**

MESTKEMLLPRPEVDGIQQSQIEMVTVGQDPGMRLMNDQVDQQRDALLS  
KDIVLHPSHVYASDPNLAAMPDSSSRARLRRILSSSHRFQVFVVSFVIVDC  
MNVIAELLMDLRILGMMEEYGMKNRNKVSLEAHYIVPDVLHSISIAILAM  
FLLETVIKIAAFGLSFLRMGWEIFDTVVICVTFVLDVLMQHSHSSTNGLG  
LFIILLRLRVARILNGMVRSVRSQAVRHVECEKRRREVLEDELLKYRELC  
QRQKKLLAEMENLLKNHNIPLPDNLVMLPSP-

Amphibalanus amphitrite XM\_043361853  
Pollicipes pollicipes XM\_037237188  
Homarus americanus XM\_042376150  
Eriocheir sinensis XM\_050860406  
Cherax quadricarinatus XM\_053773827  
Procambarus clarkii XM\_045762000  
Penaeus vannamei XM\_027375813

**Opisthokonta - Animalia - Nematoda**

**Eukaryota; Metazoa; Ecdysozoa; Nematoda; Chromadorea; Desmodorida; Desmodorina; Desmodoroidea; Desmodoridae; Stilbonematinae; Laxus.**

**Laxus oneistus TRINITY\_DN84728\_c0\_g1\_i3\_9dedup, transcribed RNA sequence. GJNO01007626**

MTGHVYKKKRPLSAHAAVGGAGREEECVIMNTEGDGSSSVTSESEHGNEH  
QPPRILHGRSLREWLDVHLSTKFQVLIVCLVIFNCLVVIVGLLIDLKIF  
ALERKNNVAAEILRYVGIVIVSLFVLEMALKVLVLGKRFFKHKMEMFDAV  
VVILAFSLGLSFGGRENSADGFGLLIMLRLLWFSKILNSMITSVRKEAER  
KMAKERRSRRALEREVAKLREYCLQQECELQMYRLLLQQNNIPEPTVLRP  
PPAPRTL SVIAEVNELDPPGTATFLAPLSAPQSGTDDSSSTNSGSFEGPLC  
SDRPPANG-

Trichinella spiralis GEBN01052808  
Plectus murrayi GGJS01022439  
Koerneria luziae GIUA01076674  
Trichinella patagoniensis GECA01018136  
Trichinella zimbabwensis GEBX01035233  
Trichinella papuae GEBW01009651  
Trichinella pseudospiralis GEBS01033974  
Trichinella britovi GEBO01040153

**Opisthokonta - Ecdysozoa - Priapulida**

**Eukaryota; Metazoa; Ecdysozoa; Scalidophora; Priapulida;  
Priapulimorpha; Priapulimorphida; Priapulidae; Priapulus.**

**Priapulus caudatus voltage-gated hydrogen channel 1-like  
(LOC106809460), mRNA. XM\_014812541**

MKGLGVQGFKKVSLEKVIIVRDDATSMSTVESEEDNFRTRMPLHDRVNA  
LIHGQRFQIFIVVLVII DVLLVIAELLVDLKVFEMEPGDSGEDASESAIG  
EVLHYASLAILSLFMVEIVVKLYAMRLSFFKHK LEMFDVVVVVAFSLDI  
AFTTNKGGAVNGLNLLVILRLWFIARIVNGIILSMTAQAEKRLHREKRER  
EAVEDELGKFRFCARQTQEIERLRDLLELNGISAHKVERTAFGSQQLQVV  
AEVNDIITSKKLEADT-

**Opisthokonta - Animalia - Lophotrochozoa - Mollusca**

**Eukaryota; Metazoa; Spiralia; Lophotrochozoa; Mollusca; Gastropoda; Heterobranchia; Euthyneura; Tectipleura; Aplysiida; Aplysioidea; Aplysiidae; Aplysia.**

**Aplysia californica voltage-gated hydrogen channel 1-like  
(LOC101848758) XM\_005100609**

MKLDGLRKMQDDLKVIERRDDTSTVTSDSDETIARGPKTLRETLD~~DD~~VIHS  
QKFMVFIIVLVVLDCLMVIAELLFDLEIVKLGEHHYIPKIFHYGSLGIL  
SLFLIEIGLRIFVLRLDFFKHKLELFDVAVVIVSFILDIVFRDNEDAATG  
VGLLIILRLWRVTIVNGIVLSVQKQAEKKIEREKHLREECEQELAKFRE  
YCMAQEAEIEVLQGLLHKHNIEFTTNKITRPESRVQVDVVAEVNSMTAVA  
ETDIPSPSPQGEQEISLSSGDNVTDVAVVVV-

**Aplysia californica uncharacterized LOC101850633\_x1-x4  
XM\_005093050**

MRMSRSIEYPSEKNGEPSCIEAEQSRSGETKMLKSEQSQDEAETS~~DS~~WSENE  
DSHSGKLDANSCKGKLAFLKTNLVQYSIIALVILDCLIIVMELLIDMNI  
IVFPEDDPPHPPGEGSSHHPVAFASRSSNLTGDNHTVYPAAHHIHTHHDNS  
SNLTMYGNDSAHAAPVHHHTNKEKAEHVLHALSLTILSIFMVEVCVKIYV  
EGKHMLKQKAEVFDAIVVIVSFTLDITFSFVSVSKAASEAAGLMVILRL  
RVTIINGVIMSVKLDANKKMEVHKKARRKLERENKRLQAKIERLREVA  
TLKQKMATSSTPQMSFEMQSGLSVERSPSGEMRENSAQV-

**Aplysia californica uncharacterized LOC101855857  
XM\_005094218**

MGDAEPRAHPRPRGQASPFMPRLRKRGEKLLHSKYVVILVILTVTDCAL  
VIAELILDLSSVKKTQGATEAMTLSFVEKIIKKYPDEVAPLHSLTDVFEE  
LNHADIVWNNTNRSGHDLDPDLERNLHHHHHKNRDALHTSVTTPTSPVPV  
VGGESVAEGWPLSSDTPLGVGNFSRALRTLWIQKRNYSNSRFRRSNRND  
SLRDSSAVLSRLLERTRLEIEKVLSKLSRRRKRSEETGGLTAEYEATDS  
GEAGDTSRNSQELEDEVLSNDDFFENNYGKNNGKTYLSSLTGLIVKILTMQ  
SNETGPILGGPARYAEAPLTVESAGKGEGKGAHVSDQDILHKYRLEFHH  
SEDMEIAKLHYASVAVVSILLIEVTMKIICAGSHFLKRKIEVFDAVIVV  
ASVIVDLIFIKGLNQFPVDDSIFVLAFLLPLVISVVNSLMAVIDHEHV  
KLRLLYSRKKKLDKTVETLRNEVDELKGMMDIRQFCIKEGIEASRIDSL  
LGKFAPRRRKDSKFYTLVKLVNSTASINNNNNNDNSVSSSSMENDLRDYA  
NRDSVLNEATSNTNTVTSKQYLSVPFFSGGNRSNTLDIESRGSGRSGGS  
PSIYITSPASDDEAPVFSFDIADEDDVDMSNDQDDAGSQDDETSIQAGSD  
AATIAVTSAEVNTVSPNVAFYVGSQSSLCSVHSQEDIRTVVDTNDNYERN  
FPMC*GV*PCASGGEDLAAAALDDVISNSPTVNSNSWGPSRHYSRFLTVPCC  
TSLSAVTNTTSTATSYPPSSNNTNNNSNSNNNNNNACAETHPLLGDPPP  
GQNMTRSVDNCDVTATQYGARTCGGRYGSPVPMRRKPCLSEKRRSYARA  
RSESIENQEFIPLMSQGANKGRVRHSDLEGRPSTRKDDLKRSRSHSPSP  
MVLLGVPGQTKKYSDPPSYQAASRSMNDVSSAGKGQSGNPHANNLGKDG  
RILRRSCLSLTSEGRKRRGKSPQRVSFKVS-

**Aplysia californica uncharacterized LOC101862058**  
**XM\_013086351**

MRQDVFTITPSTKAHGTQQVPPSPGGILKTPGKVSCNPNGKFRPGPQGAG  
MRRSVSVESTSTFDPSLERPGNLSSRQRCQRRLSVLLHTHVVLILVCTL  
AALDAVCVIGQLICDILIMREKLDHFEVIDDQLTDILFDHIPKLNQSLHP  
KWNLDAILDVLGTGRDHHSNDGPVPTAPPLASNLSSLMSVVNSSVLQNFTH  
MNQSALHHRVRAAKQEVPGHEVDHGLLYDLTHFLGSMVILSLLLLLET  
LLKVFAMGKKLRHHKLEVFDAVVVAISWALDVAFWEGIWAHPGTAAATIL  
IYMLPWRVVRIVNSFVLVIQEKDHVQLKIVKQRLRQSLKKSKEFTDKASS  
YRHEVKALAGLCRKLGANESSEITACSPSGKACRRGSIHSLVLERAAASLTFI  
STLSSMGSLPSLFDMGEMSSDEEDSRPQHQLDRTTSQAPTLKSAFSSTT  
LDSGSVVLSIDNDTGGGMEHPVFDASNSSTKSSDVKHSADK GKREVERT  
SSSDSAPPSYHIAVSKTDSNTRL-

**Aplysia californica uncharacterized LOC101857936**  
**XM\_013080089**

MRKITITSSKMPYRKKEIPKAWSMETLPPPGMVTSRPLRKKGLFHTQTC  
MEGSWQVLAQTLKIASINGLGELDKLENELEDEIRYENRSPSKTAVGRL  
RRQGQHQLHSKVLLLIVVVLNVIDCLLVMAELTDFHHVSHRLQNKLDML  
ESFIYNMITKHAPVLDNIPRSPRKSNNVLLQKILDANVVWDTSQPNVTNFA  
SNCAHLLKSTAENASQSLTGYSNMLNNSDWSEPNACFQPYMAAQNTTVN  
SAAANQKMYLSTDGQTNEKLTIVAHKLHYISISILSVLVVILLKMICSG  
KRFFRSRMQVFDGIVIIISFILDVFIIEGVITILKMDDFVLILTFLLPWRIL  
LEVLNLSLIVAVLDKQRLNLKIIYTQKKKISRNLSEVNNKMEVMQRHIEVL  
QNLCSRGLADGDVKKVLGRELSTASAKSGSSQKNGSSGGLAGMMALGKL  
AFQAADAFAPITQGSRKSHTPKTTKQNKPALNGSAPNLLTPTEEDPPTPP  
HLAHSMSQPQGESNTTSSNSHVNTVAADIEDTSRPSFTLHNETGSAEGTE  
SGIGGSVGGGIDGSGVDDKTADKENTPPTPTPIPTHDTYLDIESQPNANT  
GLETSDSSTGVNTNVATTTTSPDSVTVQIANGSGPPMDLDSNSNEERKTS  
VSLPDFSDDIHLEDSDVVSR-

**Aplysia californica uncharacterized LOC101852977**  
**XM\_013090418**

MSPGILKGPSTPRVDRPPVTISTSVRLSAQHGHNRNGVGKQARMSTGLLTG  
CRQRTLKCINCRPFLIAICALVVVECACVLAELMVDLQGIKFRFENELEE  
IKRFVLHLRTKYPGAFSDDRARTMTDVINLLDQAIVLRTRQDLLTPPKAP  
CFCPCANETSGPAAALRNSMSPAGSKQMKSHGKVQPLGVVDGGDLRVPR  
QKAQPDKYDKTRQEMIFTTPNVELTHTQIDITSSSSSSSSSSSSSSSSSS  
SSMSSPPSSALSSKLTTAQAGDVTGAGHDFGQAGSESRFRSSGNHDAPK  
METVNTSGSKQMLLSRVASFSLNTPPPGDPLRLNWKGNHPVLSNTSEQ  
SSGKSQFVFSFSQKIHRALREVGLQRLALGRRLMGVAIENDQPTPAGHPI  
SNVISTHLPNHAMTTTEAEAVTISSPSLQSGFSAHKSTADPVKGWVQQT  
TKDVTLGAITPESDSEDSLQNHNEGSSPSDVPTRTSVTDPPASPAPISKR  
ATGTLTPDSQVFTKREDDIQNSNMKNRGRDPEGSLSRQQQAGEQFLNIQES  
DIPESVDRNTSGNKSVSNASLSQRAPLPLPQNAAVHQFQDAPVPQSQNPP  
SPQIENAPLPLSQKAPPPFSQSKPPNGSSSSPGTNHLTSLGDVFVLEINN  
VIDSFLLVAEFLPDHHGSNDTKFIQYNSEYRKIYKTSKALHFISLSILSV  
MVLETAVKLFCTGCGFFKKKFEVFD AFIVVSSFALDFVFLDSRWYETGKD  
ATTILVLLLPRVVRIVNSFLMTMKHKKHLLQMMNMKRAKKKAEKLSAKLQ  
TLLSEVRKDVQLLVALCRSHDIEEKDVQACLYGKGRRSVTL SAMSTCTSL  
MLISTLGKDAIQEDDIYGKVFEALNEGDNAEIDTEIKQAEAAIDAAIE  
LDEQIEARKKSRKYKSKALVKRSYTVPRRSASVEIPDPDINENNSNIFY  
VNDGYLTAHASSPRNSELLMVESGGVAGVRSGLRGNFTLVGTPPPLPPS  
GSSEENHRLSCSRVEEESSTDENSEDALSLTAVTTDLSPQQEQQQIQ>

**Aplysia californica uncharacterized LOC101854637  
(LOC101854637), mRNA. XM\_013082371**

**M**TMEDDSTKNSRSCECTSLQ**HSVCL****E**SMVITLTIVSALAVTGEMLLDFHF  
FTVTETISQDNQSLAGEAPFREDKDVM DILDT**V****F****H**YTSLCIAGLFGLEIL  
**L**KIA**F**L**R**M**R****F**L**R**H**P****W**QILDIFVVSGTLGVEIA**F**H**F**L**D**L**P**Y**D****S**LYAVSYVV  
**L**L**S**L**L****W****F****V**P**F**V**C**N**I**RANLIREELEEDMELYRCGRQKAEERCSWLEENLNQQ  
ANIIKGLEQTLLGLKPSSMEDEESSHAETQDNSQPSAAGSHVTTNYGQNG  
PMMSEQPSVQSSRKDQ**N**Q**K**R**L**H**R**S**K**K**R**V**E**S**D**N**A**E**M**E**M**S**E**F**N**K**D**N**P**R**P**D**H**  
ARKRENISSNFSES**G**T**K**R**E**L**K**D**K**D**S**K**A**E**H**I**D**T**S**E**V**Q**L**R**P**R**G**Y**S**D**N**M**L**  
DFSNTNSLPRSEASLNSSSSTPRPGQINMRQ**R**K**R**S**S**T**S**E**Y**I**D**Y**S**N**L**S**S**P  
EQDKVFYDDVKDKFSSCPSLDHSTQSGEKERSVK**S**P**E**L**W**T**G**K**K**E**V**I**E**G**G**  
TDEVDGGTKEDADNGSIK**K**T**D**S**S**T**S**D**A**S**S**G**V**S**S**E**V**S**V**N**G**K**R**E**R**R**D**R**K**K**Y**K  
RFTSCPEYVITQ**R**M**S**I**T**N**D**E**S**K**L**L**D**E**S**H**T**T**E**D**P**S**M**Y**D**N**M**A**F**L**N**E**D**E**T**G**L**H  
VLA**E**F**D**G**S**K**T**Y**R**N**E**D**G**I**P**M**T**S**L**-

Crassostrea gigas XM\_011420311 XM\_011429833 XM\_011440664 XM\_011458201 XM\_011454844  
XM\_020070532 XM\_011450860 XM\_011440929 XM\_011436069  
Mizuhopecten yessoensis XM\_021517539 XM\_021506621 XM\_021506642 XM\_021492263  
XM\_021492266 XM\_021497401 XM\_021497397 XM\_021497398  
XM\_021512362 XM\_021497391 XM\_021497611  
Lottia gigantea XM\_009053636 XM\_009064134 XM\_009063093 XM\_009055697 XM\_009059372  
Octopus bimaculoides XM\_014933788 XM\_014930220 XM\_014931773 XM\_014930385

**Limacina antarctica TR73269\_c0\_g1\_i2 transcribed RNA sequence.  
GDRM01043900**

**M**VT**T**H**E**R**G**G**E**G**S**V**G**G**A**S**E**D**T**S**H**A**T**L**K**A**T**N**S**R**Y**R**F**P**H**E**T**H**N**G**T**K**T**G**D**S**P**T**K**  
K**P**R**R**H**I**G**D**G**G**L**I**S**I**L**A**A**Q**T**A**R**N**V**G**S**A**F**T**K**I**E**E**K**I**D**K**E**V**E**D**D**L**L**Y**E**K**R**E**L**K**  
N**K**V**D**R**F**R**H**Q**V**E**A**F**T**H**S**K**P****V**L**L**L**V**V**F**L**N**V**I**D**C**I**F**V**G**L**E**L**V**F**D**F**L**Y**F**T**G**G**L**E  
N**P**T**D**M**K**S**I**N**G**T**T**C**P**E**T**G**S**F**K**T**F**G**D**L**S****H**Y**F**H**Y**A**S**I**G**V**L**S**I**L**L**I**I**V**F**A**H**V**F**  
G**S**G**K**R**F**F**K**H**K****L**H**T**C**D**F**I**V**I**I**A**A**W**V**L**D**V**V**L**Y**K**G**I**N**S**F**T**R**G**T**A**V**I**L**M**V**M**L**L**  
**L****R****V**L**F****V**L**N**S**L**V**V**I**L**V**D**G**Q**R**L**Q**I**R**V**M**Y**T**T**K**K**K**I**Q**A**E**L**D**D**S**K**A**K**G**G**D**F**K**Q**Q**L**  
E**H**V**R**T**F**C**L**S**R**G**L**K**E**H**E**F**E**R**I**L**N**G**G**A**P**H**T**Y**T**N**G**D**L**N**G**N**V**Q**K**G**K**G**H**K**E**N**G**I**D**  
G**T**P**P**R**H**G**N**V**I**S**R**Q**F**K**K**I**S**Q**V**M**A**P**A**R**R**S**V**S**E**D**V**S**S**P**T**S**S**N**G**L**S**N**G**L**S**N**G**L**S**-

**Opisthokonta - Animalia - Lophotrochozoa - Brachiopoda/Phoronidae**  
**Eukaryota; Metazoa; Lophotrochozoa; Brachiopoda; Linguliformea;**  
**Lingulata; Lingulida; Linguloidea; Lingulidae; Lingula**

**Lingula anatina voltage-gated hydrogen channel 1-like**  
**(LOC106176220), transcript variant X2, mRNA. XM\_013558499**

MDGFKKLHEDLEKVEIKDDSNSSTTTSEMEDPKHSKQTFRQKLRHILHTN  
KFQIGVICLVILDCLLVIAELLIDLEVFEIGEAKDELGPAKVLHYMSITI  
LSIFLIEIFTKIFAMGLDYFKNKLEVFDGIVVVVSFVLDVVFANQEGAYG  
GIGLLIVLRRLWVTRILNGIIMSVKKQSEKRCRLRERMLKEAAEQELAKFR  
EYCAAQEKEIEELQALLKKHGIDFPKIEKPVEVSTISVTAEVNEVDGYTK  
RPDDNSA-

**Lingula anatina uncharacterized LOC106178050 (LOC106178050), mRNA.**  
**XM\_013561049**

MADRDDGSRRLHTIDNVENGTKKQTYQQWLDHYLHCQLANSVILVLVVL  
DSLIIYMLLLIDIGIIHALCTCSLAEDNHSSTINGSSTAGFTNKVLPVPN  
SQVNLAGEILHYISLCILCLFMLEVILKLVARSGAFFKYKLEVLDVAVLVT  
LVFVIYVVYSFDIIPSTAKDGVGLLIVFRLLWRIKEVIRGAALRLRKEAIE  
KFSRERKARIEAECKAVEAISQQEWDQREISSLKEKLSQYEDRLQPSTQA  
PEIKSALKSKSSSTKKTEQGGGRFKKKPTSQPVFTDFHDDHDQHTDDHRI  
SFDDKRRLSESKPKKYQPAITSTAFGYDNESYDGSLDAKEEEKDVDIPL  
KXLQERNMGLTYSFNWQHSLEDFVRLLS-

**Lingula anatina transmembrane protein C15orf27 homolog**  
**(LOC106155662), transcript variant X3, mRNA. XM\_013530614**

MASLLWRNPASAANCNVKKKKKYQGYICLSSQFSFLRHKSFEQELEDNDID  
DDILQTEIEAQAQAEKSCHEKLVEVLESNPIQVAICILVLIDAVLMVSLI  
MLDVHIVQAKCNANQEDISKLIDAIDSRMPGALAHVHGADVTLSDIINSL  
HGETNSSHGSSSHSVHKRDLSSVAHLLDAVQEGAETVMGSSSSSEGGIFLR  
RLLYKEETQGDNDSTLEVHVSSDKLAANESHSHSKDAHGDGHGHS LIENVA  
HALHISSIVILGIFLVEVILKCYALRLSYFRKKMELVDGIIIIISFTVDV  
IFYDGLGGRSGVDAASLLIFFLMLRMLRVFNGFLVTSRKRLKFRLLTLQMR  
ARKRAEAKISDLDVRIGFMEKELDSLRLASKYGAKNHEVLNCKPKASVH  
KNVTAKEGISSMLCASMSMMHHFASKENVAKNEQMAQITESEEVEDDNS  
NRINPFMLSPLKKGKASQMNTKDSKENETTVTGSVKPDPVDTNISSPSGQT  
KEASALNDVKIDMEDHRENDADIVANPNGKNECSATDDKISSPAPPQPSP  
QAQKSKTQDLNERNGTLPSSQSTRSRGALKRTSSVDDQNMSSCDDQGTLF  
TSGEPTPAHPPGEVDGSENLQQKSDTQTPSDCNKLNNVAAKNATILTNGD  
VISNGM-

**Lingula anatina uncharacterized LOC106156217 (LOC106156217) , mRNA.**  
**XM\_013531343**

**M**ETQIISRQDSVAMEKDKTWEKAAKVSFRKRLTKYLYSYP**LLMAISILSI**  
**AD**AACVVGEVL**IDLT**L**T**NGKTEAAESYVTSIRQALYDRFPHLKSIIATESV  
SDLIRKISNIHCPRPTTSESTVSHAPTQTEEPGVLYLNVLTGSLTKQAVP  
GQPSNCSLPGDTDQCPHALEHVLKEIG**HVLHMLS**SLFILSSIVFVHCLRII  
ATKRRFFQYKFQ**VFDA**AVVTISLVLDLAF**L**KGIWSDDTGE**AAVLVLVLVP**  
**WRVIF**IVNSFVMTVKEKDHIAMKMVKSGRKKALKRVSDLIKQAERHKQEI  
RALRGLCKKFEAPEDAINACKPQVGNNRFRRRSSGASLTMLASLAAFGS  
LGLDPSKVHPSDDEESEDGSQPYLPTSLHEKSSSVNSETTENRAVDDDSP  
SNNNFGDSFFSNDDDTDKNALDFYNENETCVELQSTRQEQQKENDKFALVE  
LPEKKPRSFVSISIGTASSFLKSPIKRLRSLTYTEGNGADSEPRSSHTAT  
LVDNMEIPNEQNEITHC-

Phoronis australis GFSC01012821 GFSC01079495 GFSC01010288 GFSC01051093  
Phoronis muelleri GKAW01058824



**Opisthokonta - Animalia - Lophotrochozoa - Annelida**

**Eukaryota; Metazoa; Spiralia; Lophotrochozoa; Annelida; Clitellata; Oligochaeta; Crassichelitellata; Lumbricina; Lumbricidae; Lumbricinae; Eisenia.**

**Eisenia fetida Ef\_Cf\_16012018\_18296\_c2\_g1\_i1, transcribed RNA sequence. GIKG01069578**

MVQMRMEGFKKVKPSDDMERVIEKDDSNSSMTTEYDEGKAYPAAWRDHLS  
LTLDSEIKFQIAVVCLVVLSSGLVVVAELLISLNVLELHMQSIVPQVLR<sup>Y</sup>I<sup>V</sup>  
IGILSVFVVEVVLKIFAWRLSYFRNKMELFDGAVVAVTFALSM<sup>P</sup>FSSNSS  
FHSSIGLLVLL<sup>R</sup>L<sup>W</sup><sup>R</sup>IV<sup>K</sup>ILNGIILSVKAQAERKLRHERHIREALEQELA  
KFREYCASQEKEIELLQAVLRKHEINYPAEKPVAVETISVVAEVNSICE  
DQQQQQQHEFHCEFAGR-

**Eisenia fetida 59034, transcribed RNA sequence.**  
**ACCESSION GIUK01058977**

MVFSMHRVSQYGGRCDWLKNQFLRDLEGDSVDAEILDEELRLLQEQQPK  
TCRGKTARVLETSPLQIAMCVLVLI<sup>D</sup>AGVVIAEILL<sup>D</sup>LHAMRSQQRAATS  
DLVQAMVFLKDQYSADLGDYHGEIGIGYILDKIRLKQNPANGNSSTTAETN  
VTRSKRHQTLQPDPKWTL<sup>L</sup>LATSVPVMPTPFEVGLREKPSEPEPLESLYG  
SSKVHKGPSFLDTKVPSFMPGHSRADVDPLSVGLARVSRRAVNGFSGLFE  
PRRKRYIRQARHKNDQDNDFVIARVTRTPVVGSRDEGSSSSSRGFIYTEP  
DSDAAAVKRS<sup>A</sup>E<sup>L</sup>A<sup>S</sup>E<sup>S</sup>V<sup>V</sup>R<sup>S</sup>H<sup>D</sup>N<sup>E</sup>E<sup>D</sup>D<sup>D</sup>Y<sup>E</sup>G<sup>K</sup>A<sup>D</sup>G<sup>G</sup>D<sup>H</sup>H<sup>L</sup>T<sup>E</sup>S<sup>F</sup>T<sup>I</sup>K<sup>N</sup>  
TYAEKLLKIAH<sup>I</sup>L<sup>H</sup>Y<sup>G</sup>S<sup>I</sup>A<sup>I</sup>L<sup>G</sup>I<sup>F</sup>V<sup>I</sup>Q<sup>V</sup>F<sup>L</sup>K<sup>I</sup>F<sup>G</sup>M<sup>G</sup>P<sup>E</sup>F<sup>F</sup>K<sup>N</sup>K<sup>L</sup>E<sup>V</sup>F<sup>D</sup>G<sup>V</sup>  
VVMASFTIDLIFV<sup>E</sup>G<sup>I</sup>T<sup>G</sup>T<sup>E</sup>G<sup>E</sup>E<sup>A</sup>I<sup>A</sup>L<sup>I</sup>I<sup>I</sup>F<sup>L</sup>L<sup>W</sup><sup>R</sup>IL<sup>R</sup>VINGIMVTAKKR  
QEFRIKLQKRACRRAEKKLECLDDELSWKEKEIHNLKNLCLRKGASEEDV  
VRCRPKRSPFFAKMDTSAGLSSIASLSLGFTMSMRSSDSRMRLPIAHS<sup>L</sup>V  
SLSGHRQTVHDVHSSSLGNPSMSLNRSGQWPRSRKPSTSTVRSSDNQSLP  
VSMRQLTESRSMEDIAERPKHQLDLSIMSSSTSMQSLAADSISNCCPVT  
SGLGLLPSRSIANDRVAAAVSGLTACNSSRPQPSESGGGIPDICIVISD  
ANGSTQVNSSRERKRSACQAASSSDSEGRPSPAESVLSNPDHGNNRTVQ  
FYVETPTDMSMENIASTASTAGAANGDGRCANDFSSPSTSSQIVNGPAS  
RLPSPPADTDRQQQQQQRESGGSLTSRWLSKLRRSSKSRSHHENQVASSS  
DKVRRKPVWVSPFAQAKEKKTKETFL-

Glycera dibranchiata GASB01008782  
Megasyllis nipponica ICSJ01060984 ICSJ01016660  
Platynereis dumerilii HALR01262921  
Notospermus geniculatus GFRY01018744  
Alitta virens GINI01122785  
Lumbricus rubellus GIKI01097867 GIKI01020978  
Arenicola marina GJHO01023177  
Paraescarpia echinospica GHDM01078138  
Hirudo verbana GGIQ01040411 GGIQ01076257  
Harmothoe impar OX381720

**Opisthokonta - Animalia - Platyhelminthes**

**Eukaryota; Metazoa; Platyhelminthes; Trematoda; Digenea; Strigeidida; Schistosomatoidea; Schistosomatidae; Schistosoma.**

**Schistosoma haematobium Voltage-gated hydrogen channel 1 mRNA.**

XM\_012937229

MDESNKELINNVPHSRAKTRPSGKCTLARKRLKQVFNMRY<sup>Y</sup>YLSVIGLT  
G<sup>F</sup>F<sup>E</sup>ALLVLCRVILETESLRLPPGNTQRLILEGQLALECLSLFTLT<sup>L</sup>LFVV  
EV<sup>P</sup>PFKIWAMGIRQWGRQL<sup>L</sup>LF<sup>I</sup>IDGLVCAVCFSLDI<sup>Y</sup>NIYRHSSRPSRGI  
TSSKVLELCNYLHITSQADTASTFAE<sup>I</sup>FGLVIVY<sup>R</sup>L<sup>W</sup>Y<sup>I</sup>K<sup>E</sup>F<sup>I</sup>K<sup>K</sup>TVFI  
KSKQSIKRIQELQQVYGEADQRINQLENILQE<sup>I</sup>DRKDNHRSISNVILD  
NKQGQQQTTRPMSKVNYSNRPA<sup>R</sup>QFSNIER-

**Schistosoma haematobium hypothetical protein mRNA.**

XM\_012937230

MSMIENDERNFSTKKENTMKHKRRQISTESNQCQSDVTNGLLLPVNEII  
EIIPIETILTPAPPPTPPPPPTTTTTTTTPTVTINTIQSCNEKYKLLFSR  
ILDCKLFH<sup>M</sup>IIVGLCAL<sup>D</sup>GILVICMLLLEIESLKLKLTHLRYRLN<sup>F</sup>TSF  
<sup>I</sup>FECISYTIILLFLIEI<sup>P</sup>IKLWTFGYQFYQYQW<sup>I</sup>ELLDV<sup>F</sup>VCIISFTVD  
TYNIHRHIMETKLNKMNTMNEYTIDDNLEQTLHTTIADAAG<sup>L</sup>LVLF<sup>R</sup>L  
<sup>W</sup>R<sup>V</sup>I<sup>I</sup>IVNSIIVSV<sup>T</sup>ATHERNMKSLKEAHHISLKRIYELEQLLQDNGIS  
IPSLTPKSQSILAKIF-

Schistosoma japonicum FN318210

Schistosoma mansoni XM\_018790876

Opisthorchis viverrini XM\_009166151

Heterobilharzia americana OX104105

Dicrocoelium dendriticum OX104059

Echinococcus granulosus XM\_024492501

Spirometra erinaceieuropaei LN077116

Hymenolepis microstoma LR215995

Macrostomum poznanienae GIJT01038552

**Opisthokonta - Animalia - Lophotrochozoa - Bryozoa**

**Dendrobeatia fruticosa db\_e\_tr88007\_c2\_g3\_i4, transcribed RNA sequence. GJXY01266092**

**Eukaryota; Metazoa; Spiralia; Lophotrochozoa; Bryozoa; Gymnolaemata; Cheilostomatida; Flustrina; Buguloidea; Bugulidae; Dendrobeatia.**

MKGIGSFGKAGPDDLERVVEKSDTSSSIVSDDIVKPPQTIREQIAEIIHS  
RKFAQIVVICLVAIIDCLLVSELLIDLKAFEQEAQVGHDIKSTSSGGEHV  
TNGEGSNVKKLEDAEKREKASLLAAEVLHYFSIAILSIFLLEICAKLFAM  
GRQFFQHKMEIVDAVIVIVSFALDLAFIDHERLASAFGLLVILRLWRLGR  
IVNGVVLVSVKTQAEKKIAKEKGLREATEAELVKFREYCTAQEREIEALQL  
LLTQNKIEFTKMAKPSLPVSTIDVVAEVNQFIEATKLASGGGGEGGGDSS  
VL-

**Dendrobeatia fruticosa db\_e\_tr82209\_c1\_g1\_i3, transcribed RNA sequence. GJXY01243660**

MTGSELMEIDEKLSRALREDSVDPVAVVLEELKSLNDDVLDHSNTRCRVRL  
ERVLESTPLEIFLVVLVIVDVIIILLAMLLMDLNVLLHLYLEDGNNAAASKLS  
TALQTNCRGNPELNLYNKSNIITRHLEHDCIWDPHSTNYTISDSASS  
EAQSPNHVTQHRRRRKRSAPPKEGSNPTIAILLEAGHILHITSVLILAI  
MVVEVVLKIFALGAKYFKGKLEVIDGIVIIISFAMDLYFI DGIPSEGVNN  
GATVLIIFLLRLILVFNALLVTAKKRLQFRIRVQKRMRSLEEKIENLN  
DDITHYEDYIENLKRLAKRHNVPDYEMKACKPLVRQLKKANTSAGLASMM  
QMSMGLMQGMNMMKVADKPRSRIVDNLRNPPTETVETDKESASAADVLVN  
AMDATMAANSTVDVVDHDSQHILPVPMMTAMATSNQSVHRSRPHRSRPHRSR  
RLPHTSTSVANGTRTIPSMFEKAVATGSPKSNEALLLNWNDKSDKENND  
PNSNQNTSLS-

**Dendrobeatia fruticosa db\_e\_tr59641\_c0\_g2\_i1, transcribed RNA sequence. GJXY01200275**

MTIPHDPVQRKPPAKKQKFHESLAKICVNHKFMLFVLIVSVGDALLVATE  
LTVDILAIKIQKEEVCDTKEILKYLKREHSGQLDELFNNSIKAILYELK  
TRNDHHYHHKRDVSAVLESEDIKVRKRAAPPKKGKGEIKESPLSSVLLF  
EVAHACRYGSIALLSCMFLINIFRVYAMRKDFHLSKLQVLDIVVIISLL  
LDISFLPQVWTFDTATLTAPIIIIGLSRVVIVINNSLINLHEKDKILLS  
RETALLKDSEKRNRRHKHEIYNLRGLCRKLGAETDITACAKLVKTIKKK  
RFSKISLASGIMSVNSLAFLGTLRSREKQPHEPNLDRVESFTKTDETKSDE  
GFDTLQRSSEFLRRNQRGSSSNKIPARRAGSRMSNVSSIGSISMASFDR  
DLDDIDNTSYERATETSDTDNDDSDGRGSKSDKSDKSQRKFF-

Terminoflustra membranaceotruncata GIMX01037542 GIMX01141019 GIMX01229943  
Fredericella sultana GHLZ01039460 GHLZ01006033  
Membranipora membranacea OU612068  
Bugulina stolonifera OW285188

**Opisthokonta - Animalia - Lophotrochozoa - Entoprocta**  
**Eukaryota; Metazoa; Spiralia; Lophotrochozoa; Entoprocta;**  
**Loxosomatidae; Loxomitra.**

**Loxomitra sp. KK-2020 isolate Shimoda Marine Station**  
**tr115673\_c0\_g1\_i2, transcribed RNA sequence. GIMU01079853**

<VEKQLEEAADASRQEEIASGLRRKIHDLIHKRWFQIVVVTLVILDSL  
IVVAELLIELNVLGDVMKKVCNGTGHEIEELNEEFLFAAEVLHFCSIGIL  
SIFLVDLALKLYAMRLDILKHKMEVFDAFVVVVSFSLDVAFI GMEGGEAT  
SLLIVLRRLWRVTIINGLSITMKSQADKKVRRLIKIKEALSLEVKQLRVD  
LARSELLIKRMNKSLEQNGLEVPGVNENSVLRKSLLPVRTELYTDCSDV-

**Loxomitra sp. KK-2020 isolate Shimoda Marine Station**  
**tr112662\_c0\_g1\_i1, transcribed RNA sequence. GIMU01076890**

<VILFLFIIELLLLKLFVMRWEFFHHKMEVFDAVIVIVVSFSLDIAFINQEV  
AQASSLLIILRLWRVTIINGFSLTIKTKSDREIHLRLTRIKDFLHTEVKR  
LRMELARVESQNRKMIRVLRRHEIQTPILPTSEVISPK-

**Loxomitra sp. KK-2020 isolate Shimoda Marine Station**  
**tr203811\_c0\_g1\_i1, transcribed RNA sequence. GIMU01203676**

<AFEGINLLMILRLWRITRIVNGLIVSVKAETEEKYHHILHHKQAVIDSL  
KSKLDRCQSLMVKHSVTIPEGLLHSMDELDAFFPAITPSTGNVCATCNI-

Pedicellina cernua GIMK01062983 GIMK01039117  
Loxosomella nordgaardi GIMJ01039792  
Barentsia gracilis GIMW01064503 GIMW01098986 GIMW01061213

**Opisthokonta - Animalia - Lophotrochozoa - Nemertea**  
**Eukaryota; Metazoa; Spiralia; Lophotrochozoa; Nemertea;**  
**Pilidiophora; Heteronemertea; Lineidae; Notospermus.**

**Notospermus geniculatus TRINITY\_DN199650\_c0\_g2\_i7 transcribed**  
**RNA sequence. GFRY01018746**

MDGFKTFKKLDDDLQRVIEKEETSSSVTSESDETKHAMMDHREHLKHLH  
TNKFQICVIILVILDCVIVIAELLIDLKVFEMEGGKNAHDSIAPHILHYI  
SIAILSIFLVELGVKLYAFRLEFFKSKMEVFDAFVVVLSFALDIAFANDE  
GIIGGLGLFIVLFLWVTSILNGIVLSVKIQAEKKLARERSSREAVEQEL  
AKFREYCSAQEREIEILQGLLKKHGIEFQKMERPIVINKIDVVAEVNEYI  
EKTNSENFSSA-

**Notospermus geniculatus TRINITY\_DN203828\_c2\_g3\_i1 transcribed**  
**RNA sequence. GFRY01079887**

MKTSSSSGTVPISEEDTTESPVSPSPRLVRHESLDTGTPKQNGSVASSLH  
VKFTVGASDDEDEPHYRRPRSRKNSSFGILDNLNEDWITRNHFLEKLEAD  
SLQSDVIQAKLAEIAEDTVKEKETCRKLAKHMTTTAFTIFILVIALLD  
TVTITAVILQIHSEHDEIIIVREQHKKFSKFTKLAYGNKVDLDNVLSGKE  
MIDRVEKYLNKTQNASAAATKNIHKRDVSEEQQYYKTIEISRRGHGS  
RQGRSAKGQGRKRSETADDDKDRGERVLVRRKRAAATAADGTPLFESKT  
ALTLANVAHNHLYCSIALLSILLIEVFVKIFALGCEFFKSKVEVIDMIIV  
SVAFFLDVYFI DGVMDNVAATILLFIWQMI VCTTILIQDRKRVDFLLDV  
VRDSNDANKKKVQEQERNNSLETAVQRLTAVAKYNGATEAEIKRCVDII  
VTVNKVEETKKSPPKPMFKSLQSVFTNVKKRRKKKAGFDLDQTESTDSKS  
NPPKRRSLTDLNVQLVHRQRMASHANIHPKSKTHRSLHILHSLHHHRHDR  
RRLHDTDDIKQNGDYHPEHSGEGSFRSPVNRRLHLLGGHTNLEHEEDL  
TSPRFTFVSSFSAPAQSPSVSRTNSILKDCSSPRFKKKDVCSPNVSRS  
SRSQNDSGFDNCGFSKADEHQERGKPSDIKGSVNGDVGIGDVRGNLPMNK  
EGDTGVSSDGTGGKEGDSNDVTFKNSGDTKSERECERSRFSDSVTEALSP  
QSNTNHMKTGDSCQKKLHGILKQPSFEVQPADNQNKPSDEAHSPTVDTAI  
INDDDEDTGL-

**Notospermus geniculatus TRINITY\_DN198369\_c0\_g1\_i2 transcribed**  
**RNA sequence. GFRY01070393**

MELMKIADNINNRRNARKPRLHPIRKEPERLTKIESLRRRINRFLNSHHVL  
ILICALVVIDAAMSIGQLMIDLYMIREKFGKAEESLLHLVDILKKDYPYI  
NAYQVNTIEDLLHAIDYGKRDLEKQTEKRTTRDAHVNLEAPPNELSSSV  
SGLPQQMWNYKRRKREISPRSKDKRERRDDVTNPFFQTSAEKGSQSLRNI  
LQTSSESQATGFHASVTMAVDDSLNHRTTSLPYTAVVINDKTKLPPKGGA  
MKEIGGKSVDLDDPVIGYTVNKTIASDYMRSKTGNSSCDCSVVQEKNSTQ  
LCHCEDDYHLLMEIAHSFHLGSLCILSLMTLEKFMKGLSQGKSFLKRKLE  
IFDFTFVVISSFVLDIVFLQGIWSTA EKDAALFLVCLLPWVIVIVNCFVM  
TMKQRHYIRMQLQKHARRKAQKKVKLFKKHLERLKRQIKSLKGLCRKHGA  
EEREINACAFVFTESRRRKSSLPVNMSTMASLALIGVIGNDPHMPRQOD  
DMEEVDLDTLDEKDEEIEELDEVENELMRIEEEPVDQGVQMNGNCHDR  
KVSTISGTESIEISCGSVSFDDSGSPTMERRLSDDSIDVIGAISDDSYAD  
TGDSDDGGRNKDEKILKSRRFSTTDFLYNSKKSFKRKKKK-

## Opisthokonta - Animalia - Placozoa

**Trichoplax adhaerens** hypothetical protein (TRIADDRAFT\_54341),  
partial mRNA. XM\_002110878

Eukaryota; Metazoa; **Placozoa**; Trichoplacidae; Trichoplax.

MIDDGDNNSETLFAVHGDNEGMNPPQSVTWRS DHRAKLRQLIYSHKVHIA  
IVVLVILDALIVIAELLIDLSVIKVHHTSPLARAFHFTSIAILAIFLVEI  
VLKLYASDLAFFLHYFEVFDALIVIVSFVLDIAYSNSEALSGVGLLVVL  
LWRIARIVNGIISSVKSQANDKIHHLRRELEKTRSYLEQKLD RKEAEIQL  
LKKVLTDRNIPIPKPLLEVLDLNGNSTAQANGSASEEITVVDIAGSSAKSTS  
SAYIG-

**Trichoplax adhaerens** hypothetical protein (TRIADDRAFT\_54343),  
partial mRNA. XM\_002110360

MSKKVKTEDKDSYIDILDEESASVRIDHANHTLQQNSDCLHKTEEIMEHP  
ITQLILILLVFI<sup>2</sup>CGIVIAELLI<sup>2</sup>DRDAIRVEDVEDVKEAFHYTSIMILGI  
FLFEVALKICVEGLAFFLHYIEVLDALVVIISFIVDIMSLVPYFYNHVFN  
LICYARAAENKLRGIGLLIIL<sup>2</sup>LWRIARIVNGIIASVKKHMRKRLETITE  
DRNRCRRKLNRAIKVARAKVEEIKLLEGILEKEGIEYRQIVAKTEQGDGD  
PAEVKLVIEEDIIDDKDNLEEEHKSIDGKEESKSNQEEKSKSIDEKEEGK  
GNQNEEGKSV<sup>2</sup>DHKEEDKSLETGQTEKSEKDAQEGDKRSSRGDSDAASHHS  
ERKADDAKDNKEEVEPEVLVYT-

**Opisthokonta - Animalia - Cnidaria**

**Actinia tenebrosa voltage-gated hydrogen channel 1-like**  
(LOC116299624), mRNA. XM\_031708302

**Eukaryota; Metazoa; Cnidaria; Anthozoa; Hexacorallia; Actiniaria;**  
**Actiniidae; Actinia.**

MDPDDQQLVGRLSFDELSTDTAEMEVGGAGDSNLEVPSTPWWKDNRAKL  
RELLHSQKAQYTVVGLVVLDCIIVIAELIVDLQILKVHHDNPAPHILHYI  
SIAILSIFLIELILKMYAMGLDFLRHKMEVFDGIVVVVSFALDIAFSGSE  
SAAEGASLLVILFLWVTRIVNGIVMSVKIQAEKKIEQLTAENDELKEEI  
IKIKTRNAELEKEISALKGQ-

Nematostella vectensis XR\_007308022  
Acropora millepora MZ029046  
Pocillopora damicornis XM\_027201316  
Stylophora pistillata XM\_022939457  
Dendronephthya gigantea XM\_028555994  
Xenia sp. XM\_047006720  
Hydra vulgaris XM\_047284425  
Acropora digitifera XM\_015907824

## Opisthokonta - Echinodermata

**Anneissia japonica voltage-gated hydrogen channel 1-like**  
(LOC117105210), transcript variant X1, mRNA. XM\_033246280  
**Eukaryota; Metazoa; Echinodermata; Pelmatozoa; Crinoidea;**  
**Articulata; Comatulida; Comatulidae; Comatulinae; Anneissia.**

MDTKIDSTNDDTPFQETKKSGEVKGTDMGFLNLTGNSKSEDQENIVKNEN  
IEVRTAPPNQPAVTESADTFRGKLQRTLHSHWFHGAIIALVLTDCILVIC  
ELVLDLSAVENENKACEGEGDEHKEEDTAEKELTAALVLHYMSIAILSIF  
MVEIVFKLYAFRLFFFKHKLEVFDAVIVIVSVFLDIVFLIYEETFMAVIQ  
LLIFLRLWRIVRIVNGLVISVESKAHEKITAQKQLREEAEEEELEQLRKYC  
DQQRQLELIMAEARKHGIVLNSISKLDPPKHRKQFKVDVDVNGPPLDST  
TNKKSHQDGFTNVTFDIQDEPADGKTGIS-

Acanthaster planci XM\_022240659  
Strongylocentrotus purpuratus XM\_030990962  
Patiria miniata XM\_038200083  
Lytechinus variegatus XM\_041600440  
Asterias rubens XM\_033772565  
Paracentrotus lividus GCZS01131405  
Echinarachnius parma GAVF01025219  
Evechinus chloroticus GAPB01008884  
Holothuria scabra GHHS01281259  
Loxechinus albus GGVM01158715



**Opisthokonta - Animalia - Porifera**

**Eukaryota; Metazoa; Porifera; Calcarea; Calcaronea; Leucosolenida; Sycettidae; Sycon.**

**Sycon ciliatum, transcript: scigl.0025458\_3, transcribed RNA sequence. HBWS01076755**

MDTDYQSYKKYEAKEKERNEEEDRVAENINLSIRSWRDLIDREHLKKFLT  
YSQKVQIFIVVLVVLDCITIVLTELLIDLGIIVKNLCEHSDSDCPLLSISPN  
GTINTTETEGYYKCFKNLEQTKCEFHGKKRCLSEDISPDIDPAYVLHIF  
GIVVLALFLVEIILKLYALGLEFFHHKLEVFDAFIVIISFSLDVAVS  
DAWEGVELLILLWVARIANGVVISVKKEAEKKAEHLQGKVEAFQEEV  
RKLKEKLAELKGYTAYEDSDNEATPSSGGESQAQDLHVPYNAPGFVPA  
TDTAEA-

**Sycon ciliatum, transcript: scigl.0041756\_2, transcribed RNA sequence. HBWS01116653**

MADSDKEGGGAAANDSSITLETLHQQDSVGSPPSDTTTAASSASSHGRGV  
DIKISVDDIDGPRENERPPSIEENTDAHHSNPGSALVPPNSADIKRVA  
SVEIVPPEELPDIDDENFDELQHVYDDETUVQLKDAWRSRKHLANFLT  
HYFHFVIVMVALVMVVLVELILDLELIRDNECRKDSDCPITRRSNLSD  
TSSIQSCSYDTNFSHCIIYHGKHSQCLEETHHDIDPAEVFHYLGIAILSY  
FNLEVLVKLFALDIKFFKHKLEVFDAIVVITSLVLDITI  
LILLELRITRIENGITLAVEEREKEKRHLKHKDLALKDVDRLQKIVH  
ELKVEIHEWRSRAHVEPTYKGLRHADELQSMIAEEEEKHHADGKHHGHHH  
HHHHHHGKNHHGKNHHHGHKNHLHGNHMQAPSSDSNHSLSHGSQAQSA  
AV-

**Sycon ciliatum, transcript: scigl.0080075\_3, transcribed RNA sequence. HBWS01098561**

MSDVSAATEAGTPGLFEVLSDAEGARSSSGNTSRQEDTAKSASPTKSETS  
SSGSATKSGTSSRGDPPAYDDDHAAAYIAQQKAAVHRTTFELDGRPLPDL  
EHYYDEFHDPEPEDEPSHDFKDFWRSHENFKAYLTKNHHFHEFIAFLIV  
LDILIVLGELILDLEILRADECAHDHDCPLVEATVNGSMWDCSFNSNYTT  
CLYKGGRHTCVDEYTKADKDPSEILHKLSIAVLSCFVLESIVRLVVLQRE  
FFKRKLEVFDSIVVTTALFLDIFVHHGAVALLLFVRLWVTRIINGIAI  
AMESREEAKRHELKQNRCAHELVRKRETVHLLRIELMEWKKAAAVFHE  
AEHFTVAAPMPTG-

Oscarella lobularis GIUN01026972  
Hymeraphia stellifera GKDX01077406  
Cymbastela stipitata GHWA01021218  
Aplysina aerophoba HANI01325610  
Leucetta chagosensis GIYV01003700 GIYV01008849  
Eurypon sp. GKDW01052485  
Dysidea avara HANJ01327516  
Halichondria panicea HBWD01528479  
Halisarca caerulea GFTQ01354451

**Opisthokonta - Fungi**

**Eukaryota; Fungi; Dikarya; Ascomycota; Pezizomycotina;  
Eurotiomycetes; Eurotiomycetidae; Eurotiales; Trichocomaceae;  
Talaromyces; Talaromyces sect. Bacillispori.**

**Talaromyces proteolyticus uncharacterized protein  
(BGW36DRAFT\_366576), mRNA. XM\_046214761**

MASSADPSQPLLGDQQQIERRQQQQRSDDVTRKSSSPSASHDLLRRITES  
HFIGNRMPSSWSSRGDGGEYGHRYHDYYNEYYPEPSSSIPRLRAKARSAL  
SSKWGHYAVLFLVAVDVACIFAEFLIELHTCELRRERHQVVD RRWEIAQEA  
LGLSGLIFSCLFMV ELIVTVLSFGLHYFKSKFHIFDAIVIVVAFVFDVAL  
RGLVEELGSLVVILFLWRVFKIIIEEMSEVSAEMMEKYEDEIDKLKHENMK  
LKRKLRGYGDEDDDDMEANAGGDEEEDNND-

Aspergillus ibericus XM\_025718342  
Botrytis fragariae XM\_037341616  
Aplosporella prunicola XM\_033538120  
Grosmanina clavigera XM\_014317838  
Hyaloscypha bicolor XM\_024883444  
Phaeoacremonium minimum XM\_007913592  
Penicillium zonata XM\_022728519  
Lachnellula hyalina XM\_031151652  
Venustampulla echinocandica XM\_032013960  
Sporothrix schenckii XM\_016736437

**Opisthokonta - Choanoflagellates**

**Eukaryota; Choanoflagellata; Craspedida; Salpingoecidae;  
Salpingoeca.**

**Salpingoeca urceolata comp17136\_c0\_seq4 transcribed RNA  
sequence. GGOY01009290**

MATKADDPFSASASIGRSTLTTLAMSALGVSNAAEVYIRTFPIGAVPRVLS  
GPAKSFRQRVHDWLERKHHVHN**FLLFLIALDVLIVLAELLLEFEDCRLELH**  
DLEHDSHSNEGKIERIKKA**EKGLRIVTLIIILSIFMIEVAAKVYVLRQTLF**  
RHK**LELFDVIVVIVSFCIEVFLKGFERRAASIVVIFRIWELTRIINGVAV**  
ALELRMEEKVTMLKHAVDFRQKFSVAEHLASLRAQLANVQAQAASHLQ  
DEVAEMQSTTRRVQRLLETPVVSEETVLSTSGRFKAQEGYVPPGNSL  
LVSGHGPDPPLAPYRAKSSPGPTNTLNKSRVTWQVTDSDDENGD AEHVYRA  
RSLPTHDLPTPQDSVELHADTNTQDDPESPQPGQSPDVGWASKV-

Salpingoeca dolichothecata GGOK01012774

Salpingoeca kjevrii GGOX01017848

Salpingoeca punica GGOZ01029229

Didymoeca costata GGOQ01021484

Stephanoeca diplocostata GGOS01015804

**Opisthokonta - Ichtyosporea**

**Eukaryota; Ichthyosporea; Ichthyophonida; Amoebidiaceae;  
Amoebidium.**

**Amoebidium parasiticum JAP-7-2 G13375\_050632 transcribed RNA  
sequence. GAKF01050632**

MVYGNHLQRHQTRVAGGFHITPHLVLKEPQFEKAEGKHWRNQLRDFIHSK  
RVHTIMLVLLVLDVMLVITGIALEIQNLSGALHLCESTVESCVAKESCTM  
RDFENHALVTAEHWTAYLSLAIIAIFIENLLLIVALGPIGYFSNLLYAL  
DFVVVITSFVLETLEIDKPEEGLLVLYRVWRFVRIAHTFYETNVDEELER  
VKHAIKQAERELLAMSLTPEAQKEAHEALAKRMAESYPDAAGAILSAAIH  
YAEHNKHGKTPQSDPMEVKSSTEGEEEATVQQ RTP-

Archaeplastida - Chloroplastida/Chlorophyta/Charophyta  
Eukaryota; Viridiplantae; Chlorophyta; core chlorophytes;  
Chlorodendrophyceae; Chlorodendrales; Chlorodendraceae; Tetraselmis.

*Tetraselmis striata*, TRINITY-DN8512-c0-g1-i1, transcribed RNA  
sequence. HBPS01066517

MERSGSSAKAIKPVRLDRKSMTVLDRLSIALKREQSTKRLQQQQSGGRP  
AKEQPEGKGAVEGAEEEEVKHHWRRRLHFLHIRWVHTTMTALLILDIT  
VVTSLLEIQIQSSQKKGQAKSICLHEYETGHAMPTYMENNTTCNPDGLHAC  
DYTEQEPYHMAHTLHSAELGLAYISIAILSTFLENLAMVAALGWNFFRH  
FFFVLDIVVAVSLALEIVAVASAHLELTVGNILIVARMWFFSVAHGIY  
FLEHSEEA AHEVDDKDAGDSMGKKQSQVENGTTV-

*Ulva lactuca* GFUR01058327  
*Ettlia oleoabundans* GFXW01038773  
*Chlorella* sp. GGGA01109849  
*Nephroselmis pyriformis* HBHO01063905  
*Chara braunii* GGXX01073780  
*Chlorella sorokiniana* GAPD01037882

**Archaeplastida - Chloroplastida/Embryophyta**

**Eukaryota; Viridiplantae; Streptophyta; Embryophyta; Bryophyta; Bryophytina; Bryopsida; Funariidae; Funariales; Funariaceae; Physcomitrium.**

**Physcomitrella patens voltage-gated hydrogen channel 1-like  
(LOC112276685), mRNA. XM\_024508236**

MDAHGRTDLEGADWDDSATALLPEREPQDAGDGEMPDGPDASSLGSALQ  
EVSKAWRKRTQAQRLSAQRWIEQETHVPRRARWREELAEALEATWTHVAI  
VVLILLV<sup>1</sup>DLAATAIDILKTMHNKSHDL<sup>2</sup>DVCVDLVESCQGCIGHFEHSAEWK  
WTYWTSIVILVILMLNVGLIVAFGRSFFLHP<sup>3</sup>LYVLDLVVVSTALGLEVL  
LDADTAGLIIILTL<sup>4</sup>WRIV<sup>5</sup>RV<sup>6</sup>VAHGIFEVTD<sup>7</sup>EAWEKSIRELETQVKGVQDAY  
ERAQEALQEKNRELGEKDGRIAELEARLESGSTPF-

**Physcomitrella patens uncharacterized LOC112285145 (LOC112285145),  
mRNA. XM\_024525718**

<LNDCIAMVESCTSCGSYFERREEWKWTYW<sup>1</sup>TSVAILSL<sup>2</sup>LLLN<sup>3</sup>VFGLIVAF  
GMA<sup>4</sup>FFLHPLYVLDLIV<sup>5</sup>CTAPV<sup>6</sup>LELT<sup>7</sup>LHTDTAGVIIM<sup>8</sup>TL<sup>9</sup>WRIV<sup>10</sup>RV<sup>11</sup>VAHGI  
FEVT<sup>12</sup>DEAWEKDIHRL<sup>13</sup>ETQVQAVQSACDEEQVLLQERDQQIAELEARLREL  
TVIET-

**voltage-gated hydrogen channel-like protein [Arabidopsis thaliana].  
NP\_001321473**

MNIINTGTVDNVEFSIQNLIKSWCRRRKWRQLCNFSPKQQQEELISINQQ  
WRITLSNFLESYQVH<sup>1</sup>LFTIFLLSL<sup>2</sup>DIILTSLELSSSL<sup>3</sup>LSCTSVKKTETEN  
EWF<sup>4</sup>RWGG<sup>5</sup>TVILSILAVKSMALVVAMGKSFFKQPGCVMDG<sup>6</sup>TLAIVALILQV<sup>7</sup>  
LLEKKGTG<sup>8</sup>FIVVVSL<sup>9</sup>WRIV<sup>10</sup>RV<sup>11</sup>VETAFELS<sup>12</sup>DEAIEVQIDGIISQFQALSKE  
NRTLLET<sup>13</sup>LAEKDEVIKMLEEELNRFKENG<sup>14</sup>DIPFVKP-

Selaginella bryopteris GEMU01010353  
Bryum argenteum GCZP01005159  
Sphagnum palustre ICRE01047567  
Triticum polonicum GEDT01074033  
Ginkgo biloba GHLL01415143  
Marchantia polymorpha GEFO01020457  
Selaginella sellowii GIMF01015262  
Dicranum scoparium HANF01033133  
Isoetes echinospora GGKY01088505  
Lygodium japonicum FX959670  
Pinus sylvestris GHKW01007963

**Archaeplastida - Rhodophyta**

**Eukaryota; Rhodophyta; Florideophyceae; Rhodymeniophycidae;  
Gracilariales; Gracilariaceae; Gracilaria.**

**Gracilaria vermiculophylla Cluster-14487.30734, transcribed  
RNA sequence. GILD01028259**

MATDQQEAAAAAKIGCAPLKQANLQQPQPMRRPSLASSSRGSLSTNSM  
YFGIPTTADAEDHAEERHGTHSWRYRVVAFHLHKPRVQKIVMGLLLTDVIL  
LFVELFLLATFPHCSIIERDGLSCVPANGTTIAAAAAAAAAAEQEEVEHR  
WLLVAATRFLAGGGGSGDDHGDGSAICEEGYEWNGLEAGCDEYKWSVVHT  
LETFIFSLTVIILSLFFIELTVEMLALTPQIFFRQFWFLLDYVIISISLA  
LEIAFRVKREDVYQSFAGLLVVVRIWRFVRIHGIVEVTHENEENGMRRL  
FQYVQQLEGLLQTNLDIALPGCAQHIIHHVHHDHAQHLLDVIEGSAKQTPS  
RVRFAGEDSDIIMDEEGKGDDDESSAADPEKRWDTTSL-

Rhodella violacea HBJD01001165  
Timpurckia oligopyrenoides HBFP01003029  
Madagascaria erythrocladioides HBNE01039390  
Devaleraea ramentacea GFTF01008765  
Devaleraea mollis GFTE01010127  
Laurencia pacifica GFZU01160101  
Erythrolobus australicus HBGI01005155  
Rubrointrusa membranacea GFTD01034059  
Kappaphycus alvarezii GGUP01041343

**Sar - Alveolata**

**Eukaryota; Sar; Alveolata; Dinophyceae; Gymnodiniales; Kareniaceae; Karlodinium.**

**Karlodinium veneficum voltage-gated proton channel kHv1 mRNA, complete cds. JN255155**

MDRILHHAVHTVHTSKSARDAEGHGTWQSKLNEALNSSKVHTILNVLLIC  
DLMTVIIGMLLEQYYSDSQVQGLTEAFKDCLEKRTFCPDPSHLAHYGNHD  
LHEWAERMEYASLAILLIFLLENMLLVLANGCRFFANPFHILDIVVVVVS  
VGFEIQGILGEGHDAGIGLVVFATWRFIRLGHGIHEMHEEHEAEDHGEH  
RVSDAAGSLEAPLQKGSFEQHAAGTSGVHHARSQASSNREGREGCCVQ-

**Karlodinium veneficum, TRINITY-DN53119-c1-g1-i1, transcribed RNA sequence. HBOS01067516**

MWRTASATGTKKSKIRRVPHILDEISHEATHFRRLLLHSKPVHFTILVL  
LIAGLICLTCGVLEAHYHLHGKSDDCQNYVNKCLIHHRRLVNWPGRPELE  
LPSWLRSPWMSDAGAEAEWASNAELLLDEEFQDDQAPRMLSGSASSSSAS  
STGSSASSSSSGSHGSSGSHSSASSSSSGSHGSSSGECAGHPHFGDHTLHDI  
EIIILAYISVGILSLFLVEQVLLIVDLGKEYLKPMFILDVIVVSSLLIEI  
LVVNMIGGLLVLAFTWRFARVGHGVFEAKEMIEEMIGEDDDTVKNMMDA  
WKELTPERWEEILHSGSAEILRESGVTPAEIKLGEALGNPAVAMRALAF  
ARGWKQKLDKKKAKRLSGSNPKRQMPGASLQTTATVGKGHSEH-

**Alexandrium monilatum, TRINITY-DN21304-c0-g1-i2, transcribed RNA sequence. HBNR01032293**

MLAQGRCVHSRVGGQPCLRTLAAHARSAGGAMGHEHQSEGEDDILAAGSLI  
ALPLRFMNSTAGHLLFFLLVLVMIVVASGFLDTQYLLSQTKDCKGYVT  
ACTNHSRRLGNDGREEQHARLRLASSGGGSSAPVDCSADPHFGDHGL  
HDAEVILAYISIGILGVFLIEQMLRVVSGCRYLAKPLHVLDICVITLSL  
VLEVLVTHLPLAGLLVLGRVWFARTGYTTAEGLHDIHKVRPAFGSMAHG  
AIEAVWPRLPEHRWKALASRSSMELDLEMMEVNLAETIAKTS PGFVLHAL  
ARENERLRTPRSNPAVLTEMTDATEAS-

**Karenia mikimotoi isolate RCC1513 Kmik\_DN141715\_c0\_g1\_i1, transcribed RNA sequence. GJRC01038612**

MSGKVHPMAVSGESQQVDTVKAQEVQEVKEATLDDEATLDDDAYNEREDK  
ETNRLKQVLEQMRRENEADRLQAQRRALFVKAKDEEKEMGHDHGKHSW  
QTRLHLRLHHHYFQGFLLICLLLLDVVVVVVELFLEAQYPDCDIKRDVAVS  
CVPIACAPSTHGSTSSHSSSSATTSSHSSSTSSGSSSSSHGRRIAGMEEGD  
WEYGQDAWSWPAEEPLGLLSWESRGRLLSGDSHGPTCKDSHLYSPMESAK  
ATCDEHKYGLWHTVHHLLVGVSVFILGVFFVELILLFTCLGCGFFKNPLY  
IADLFIVSVSLILEFLLMSFTEQSLVSLMLFAFWRFVVAHGLITSVHE  
PMSHKCEHMEDIVEQLNARNEKLARAERHMKMIDFLLKDSKDPKAAKAA  
ALKAACAAMAIEYPQAPDHDGRGPRESARAPEGDAAPFLAEHSER-

**Scrippsiella hangoei, TRINITY-DN19376-c0-g2-i1, transcribed RNA sequence. HBPM01014491**

MSLCRTHCSWKLSDRRLRSGWRKTLGEAVEGTVMAMAVCLLLFVDLICTFI  
DEIIQNTDLLNPKYEDQGEGVAKWCEHISLVVLVLFMLELSLGVVAFGKR  
FFSHIWYLLDFGVVLSLICEIVSRFYDTDGAQLLAGILILLRANKFFAF  
GFDILMLRHKVHEFEEHNVNNGNEPTPAPALAEELDQENRT-



Karenia mikimotoi GISR01074873  
Breviolum minutum GICE01010199  
Pelagodinium beii HBNF01018002  
Symbiodinium sp. HBTG01074859  
Durusdinium trenchii ICPJ01008996  
Lingulodinium polyedrum JO744110  
Selenidium pygospionis GHVN01105692  
Gonyaulax spinifera HBNG01058504  
Prorocentrum donghaiense GHMW01205561  
Dinophysis ovum GKBT01018307

## Sar - Stramenopiles

Eukaryota; **Sar**; **Stramenopiles**; Ochrophyta; Bacillariophyta;  
Mediophyceae; Biddulphiophycidae; Eupodiscales; Odontellaceae;  
Odontella.

**Odontella aurita strain CCMP816 TRINITY\_DN47737\_c0\_g1\_i1,**  
**transcribed RNA sequence. GHBW01044937**

MSTTPMKQKSTLKRLLQEEEEAGITTTIRCFVPEKEEVWFVDHNTKEGNW  
RRKLIRIVHSTNAQ LILGFLLLLDVVFLFTQVFL DAHFPPCYAIIGKAEC  
SQGELICNPKPSG IIVDQILYIGSVSILCVFLELGLLFFVCL QIQFFRN  
CGY WLD FVIVLTS LILELVL HGSSDASAASVVI I ARIWRLLI IGHGIFNS  
KRRQIIARMLADEEDLYIHDHEPYEDSSDEEDYPDKEEEYGSDKVIIRRLS  
HRIVKRRSYLAKQEDKENGPHL>

**Odontella aurita strain CCMP816 TRINITY\_DN117390\_c0\_g1\_i6,**  
**transcribed RNA sequence. GHBW01194335**

MAPQEQGDHVFDESETPSSHSHKVGRPPVHIPTDEEVETHVQELHGHDDWR  
SKTLHVLHAKP ITFTLLGLLVLD VFILFAELYL GAEPSPCTIIERDAISC  
CPAEEGAGGDHGGGTHRWLQEMQEIVSDKGFYRDAADKWT SIGSSGKDWS  
RALAEETHDDHADGSHAEAEVERLFHDEEDGHGDDHGDEHGDDHGDHGD  
GHSVASASGHGAHGDGHHASHYCTNGLTDMDPAKYPAACDPHKYEALHHA  
HHVLFWLTIAILGTFFLELSIMIVCLGCTFF TKPFY VLDL FVVTTSLLLE  
LTFHFV DQESLASLAGLLILA FLWR FV RIGH GLVEST NKWQAQKHERLLK  
YIDQLEGLCKDNGVELPDRQSIRNLKLLNDEESSTE-

**Odontella aurita strain CCMP816 TRINITY\_DN105452\_c0\_g1\_i4,**  
**transcribed RNA sequence. GHBW01145983**

MSPHDSRDSATDVPARPTMQLAGTTS DRKADAKVTALSRFSVSFNEDPS  
EDSNGCFGRKTRRFKPAIPTSEEELDKVEERCGQNSWQMKAVKFINS GPL  
QK LLLVSLLLC VIILFIELYLDASY PSCHTVSRDAISCCPAGCSEKGYV  
DKYDDHKDEYDDGHRFLGGSGYGYCEYPLEDTHHPAACDDHKYEGVHKAH  
TILFAMTITILSFFMIEILVLIVCL GPMLFFGR FLYVLD FV VIGSSLSLE  
IVFATM DDAAAAD VAGLLVVF FLWR FV RIGH GLVAST HEMATHKMNKLKK  
YTRALEEEVIRCGGVLPEKWSLGLLEETASNHLSSGGDSTSVKKISVEL  
GGRVVNTEHLVSKRH TTAGSAEDTERETSSSDVDTKDAFVDNALAA-

**Odontella aurita strain CCMP816 TRINITY\_DN85551\_c0\_g1\_i1,**  
**transcribed RNA sequence. GHBW01102851**

<GGASAGHGYCEYPLEDTHYPASCDDHKYEGVHKAH TVLWGITIAILSFF  
LLEILTLMVCL GPRTFFCR FLYVLDL FVITSSLALEITFATL DDRKAADI  
AGLIVVF SVWR FV RIGH GLVAST HEMAAHKMKKLK KYTRSLEQEVIHCGG  
NIPESKWSSQRTLQQLSDNSTTVRDTMPSEDSGREA-

Phaeomonas parva HBGJ01043600 HBGJ01042220  
Aplanochytrium stocchinoi HBIN01016972  
Thraustochytrium sp. HBSU01005162  
Nitzschia palea GJPG01004537  
Navicula sp. HBQT01027484  
Grammatophora oceanica HBGK01048152  
Heterosigma akashiwo ICRV01078048  
Chattonella subsalsa HBNW01021031  
Thalassionema frauenfeldii HBL01017232  
Licmophora paradoxa HBMT01029076

**Sar - Rhizaria**

**Eukaryota; Sar; Rhizaria; Cercozoa; Chlorarachniophyceae;  
Amorphochlora.**

**Amorphochlora amoebiformis, MMETSP0042-doi:10.5281-zenodo.249982-  
Transcript-23202, transcribed RNA sequence. HBEM01014674**

MLGGPRTTNLQHASSDITAYGHQGGMKPEDEENTKVSRAHTQPMVGRERQ  
YRRPRRRAPFQSPDGKWRGEIRNDFALGHPILKHFIRPPGRLEGHHGEDW  
HHKLNRFLLHHHRTHLVLNILLIVDVVLIIIAIELEFAFKNSEIQDLEHAC  
EEVEAMHAGASCPSPHGDKSLEDGVRGVEYASVGILCIFAIDNLLLLLLAN  
GKEFFRNPLYLDDAVVVYLAIIFFETVLSGDGGLAGGIIIIIVFAWRFRIG  
HGIYETTHDSPQKQDEKSRDITLKRASIGSAPDQKTSPDVENAVKT-

**Amorphochlora amoebiformis, MMETSP0042-doi:10.5281-zenodo.249982-  
Transcript-22745, transcribed RNA sequence. HBEM01014165**

<AGSPGRMAVDPFLLQATTPLVRPDAKKNVSICSCCMYATSYHTKADHMG  
DCWQRSLLRFLHNAAVQDFLTFLLLLDIICVVSEILIEHYSQEGIEVPED  
LELGLKYTSLSILITFCVEIFLYIVAKGLDFFTEPLEVFDMFIVAGSLYQ  
DVVYEEATGGLLMLLVWRFGRIFGVWATEHERCATRIRQLESKVRYL  
KKNKQLESQKVNLLHHEMYSDDGGSSKAGTMERL-

Bigelowiella longifila HBMK01033472  
Lotharella globosa HBIV01019936  
Chlorarachnion reptans HBKK01013759  
Lotharella oceanica HBHP01002709  
Bigelowiella natans HBQC01075387

## **Haptista - Haptophytes**

**Eukaryota; Haptista; Haptophyta; Prymnesiophyceae; Isochrysidales; Noelaerhabdaceae; Emiliana.**

**Emiliana huxleyi, TRINITY-DN7767-c11-g4-i1, transcribed RNA sequence. HBNU01018021**

MAEIQTLQPPPTSRLGGRVKEVHSPEKLERKLLKANPRENTLRKRQAVY  
AAMDALAAAGASEVTSPKTRYGARAFGKPLKAQLLSARAEVEKAHAHGA  
DSWQRRCLHLLHSHRVQLFFILLLLVLDMLIVITEICLDLEYPSCRLAKRD  
TVSCCAAGEEGEHHTLRYLAEEHGGHSLCGKGTVEGPHGVGCDEHAHP  
AVHTAHAVLTWASVAILSLFEIELLTLLAASGLRDFFSNVYYVLDIVIVS  
ASLVLECVFYNTAGLSDLIGLVMFLRLWRLLRIGHAMFASTERASSTDNL  
KEVVRELRAELDLLSEWAEERASARAPPDDPGVDDIG-

**Emiliana huxleyi strain CCMP3266 Ehux3266\_tr10784, transcribed RNA sequence. GIZZ01010784**

MQSQQRRGAKWVSADSEARALSSRRGSYAWQTKLLAFLHSPRLQALLTLL  
LVCDVIAVFGELFI DAEFPSCMYVLRDAIPCCDSGCIGAGDYSAAAADA  
IQTILSLGKSVQGDHLHLEHDETRAEICAGQGSHLDSTGRIGCDSHKHD  
AHKFHKFLFRVSLTVLVVFELELLGLIASLDRAFFRNPLYVLDLIVITVS  
LGLETVFRVFSMPEQDLAMALIIVRLWRFLRIGHGIFASTHSVAKESDK  
LHAEIRALEEEYTRALNQAASLATTTTRPTRLASAPSSTSGSPSATRPPPF  
RGRSASEASAATHDLQGAGGEKLDGVAAALSQRSNTPTSPVGAPAMRRP  
PAAAPLGAHRAHQLGPPSSAARTGMPGVGTRMGAGEAAAERQAPPAAE  
PEPAEGAAAESVELELDALDMST-

Calcidiscus leptoporus HBER01001684  
Gephyrocapsa muelleriae HBRT01056448 HBRT01109117  
Coccolithus braarudii HBEY01039257  
Scyphosphaera apsteinii HBMI01021482  
Gephyrocapsa oceanica HBTM01082732 HBON01067641  
Prymnesium parvum GBYI01026351  
Phaeocystis sp. HBQW01022812  
Phaeocystis globosa HBRY01039040

**Haptista - Centrohelida**

**Eukaryota; Haptista; Centroplasthelida; Pterocystida; Raphidista; Choanocystis.**

**Choanocystis sp. FB-2015 c53027\_g1\_i1 transcribed RNA sequence. GDKX01062209**

MEHNPQRDSL RQPISEKYAAKRASHGSLEARLVDTFKMLDRNANGLVNVN  
ELRVLVNTYLET PLETEEIVDTLQQLLPDKGLAPDPHKS IKLNRDDFLKA  
MIHFREQNSFPT PLMTRLHSDPITFNGRSALSTSKPCLSERQEHHVNVIS  
ASNPNLEEHRQM TRKSTRQRLSRALLNLPDDLYVSGETTLP SKSQSGRSS  
HSASLAELVEEP ENPKQEAKIENRDRSARVALAQHLNSTAMQ VLVVFLVL  
VDAFVVIAELMVLS MPCHVPEPCGLSNFNATETLDGFGQCLSKYEHTCES  
FHSLMSVLRWSSKG ILMFFLAQIICLALCVGWRFFKQPPFFVMDLLVSSA  
MALEFSVSLRGG RMIVFVLLWFEVIAHALATTI DIHISNMERRVMRQTG  
ADVRAASTLQRE IRSHQQTNRVAMERI QANSNRIANEEEFIESLKMEELR  
DMILRERNHTSEV KQRVKELQEILTVVQGHMEAKRSQFKNRHIKHQARQH  
PGLAVQYSTSSRSV STAGTIHHRDPVV-

**Choanocystis sp. FB-2015 c20243\_g1\_i1 transcribed RNA sequence. GDKX01034169**

MWVEGKGVESLE GR LKETFKMLDKDSDGHVDVHDIKV LLELRDQQPRTDA  
EVIAI INRILPGKTHLAALTRKGKVTVSEEEFVLAMLHFLSNEATERAID  
HDDLHNAFIDHLLDLPESDQSVTIDVDKSSKASRKSFAAARKSFAHAGQA  
VKQARKSFANMALATRD AELDS DRAKAAGLAGFLNARVVVASRLNSTPMQ  
ALIVLLVILDAFAVAMEIVLLGV QCKTPSECYAPSAEVHHKAGGGVVTDG  
SKYDATTC LHKFDHVCHAVHQIEYILKWISKG ILLFFIAQISILAVSIGI  
RSFLRQPFFVLDFVVVSVALGLEFGLKNAGGALLGFVMLWFLIRIVHAF  
TTLDVHKGTVERHILRQEAEAKEALQIQRAIQEHRKLGQPLVNAIRHKT  
IRRIEKRSALGKSPRLSAMTNESGLAATPVSHNMSVSSATTLPDISITLV  
ETEPEVRDEEYWMGRVATLEAELKEDKVHVRELESKFVDIQNTLT TVYAH  
LEGKKQRFLEKVLKQNQALNIPARGSLLEFTKEMQQIQPK-

**Amoebozoa - Discosea**

**Eukaryota; Amoebozoa; Discosea; Flabellinia; Dactylopodida; Paramoebidae; Paramoeba.**

**Paramoeba aestuarina, MMETSP0161-doi:10.5281-zenodo.249982-Transcript-29362, transcribed RNA sequence. HBKR01021517**

MGVIKGGLYSTEGMWKHNSTKRDKVLHVIHHKYTHFFITALLVIDLCVVI  
TSISLEIEYLTSEVTDLEECVHECFFGDEHDEEHRSLTQQSFRQSNHETQ  
EKNTNEALKRREEREREREYRESRQNDSDHDEEKSEKFLECEATAMFE  
DDDDNWGNGNLKEAEALAYVSIAILCVFIIEHMILFGAMRMDYLRSPIL  
IFDFFVIAVSLALEIIFQQQPEAGLLIVARAWRFIRILHGFHESTSDEVV  
KETVHALNSKREDILNIYAALDDRLLVGASKKEAMENVAEQYPETIFEIL  
QILGHHFQDKDKQEHLEHIKDTIEHRMHPTPSRTHL-

**Balamuthia mandrillaris strain CDC-V039 BamaA010555t1, transcribed RNA sequence. GISS01003879**

MAEHGDATPLLPSHGREAIGNGNHSRWRWLLDYPHQKVKRETAAGPPSG  
LRALRLSMARFLEGRFMQYFLLALLVLDVVLVVELGIMEASCESGKEKS  
DHTFHIIEQVLRVYVTLISILSIFAFELLLLLLALGLDFLKHPLYIVEVAII  
ATAFVLEIGLRHLQAISGLLVIFELWRLRLVHGVITAQQDLHRNTKQNL  
EESRARVHELEQEVERLRRRGSIRD-

**Balamuthia mandrillaris strain CDC-V039 BamaA008510t1, transcribed RNA sequence. GISS01013796**

MTTRRTSSGRREKDEGAHELERIDHHHQEEEEKGESSEGKDDEAVNPLGK  
TKQKHLREQHHKYQHCKHPHHHLLLETTRGLVGKFGWLLGTHKYPHQKK  
RERLEKAEHFPKIHRIRVKIAQFLEDPRFQYFLVALLLVVVILVVELLL  
LERTCEGEEENEEEDHAVHVVEEVLFWFTVTILSIFALELLTLFFALGLD  
FIRHPLYVVDALIVAAAFVIEVVLRTLAGSLLMLRLWRIRIAHGIIT  
AHQELHHQTKKDLHVALHRINELEKLLAEA>

Paramoeba pemaquidensis GEWA01008129  
Balamuthia mandrillaris GISS01013796  
Tubulinea HBYL01016471  
Acanthamoeba sp. IACY01017688  
Acanthamoeba castellanii GJZG01027302  
Vannella HBXS01019840

**Amoebozoa – Mycetozoa**

**Eukaryota; Amoebozoa; Evosea; Eumycetozoa; Dictyostelia;  
Dictyosteliales; Raperosteliaceae; Raperostelium.**

**Raperostelium potamoides strain FP1A RPO\_TRIN\_CL14637,  
transcribed RNA sequence. GIOX01005152**

MALVKGRYKFPFHFAKNSPRHKARRLWRRKLGSFLESNRVQIAIVALIFL  
DLIIIVIIELFLEEHHYKSQCAEEHEIPHVIHRLLENALGIITLVLLGIFEFE  
ILLLLFAFGRDFFKHPLYVFDAIVITVSIIVEVVFRDTAGALLVVFRLWR  
VVRIIGHGIAISVETHDKKKYKELKSRYRKVEDNKVYLNQINVLRNRMGE  
IAISPPNLSEVSANTSSIFSPSRSENIQSPNSTTPINEIKDDISDLSADS  
DEDNFNEKLKINSNNNP-

Hagiwaraea rhizopodium GIOY01027566  
Raperostelium gracile GIOO01028008  
Physarum polycephalum GDRG01015357  
Heterostelium gloeosporum GIPA01000642  
Cavenderia multistipes GIOI01021321  
Tieghemostelium menorah GIPF01006404  
Cavenderia bifurcata GIOH01013395

**Cryptista**

**Eukaryota; Cryptophyceae; Pyrenomonadales; Chroomonadaceae;  
Chroomonas.**

**Chroomonas sp. Dc01 RNA, 13hcomp50078\_c1\_seq1.p1, mRNA  
sequence. ICPR01036203**

MMNAPYFPQVGMGFGQHPPPFGLSVDGGEKHEHHAEAQA AHDAAESLVHK  
LRTHGERLLKSGARRFRPIRSYWL TADQERDRVIEKHGEDSWQAKVVDFI  
QSRSVQA **LLISLLIL** **DVIIVAIELF** LEAEYPPCVIVKRDAVSCFNATALV  
GMSAAALESSTHARAKILSPRGEGTLKHAAAATRTEALHTHTPENGTVHE  
GVVEGGEHHDVCEEAGLISTGFEASCDKHKWSRVHDTHTT **FLWISVAILV**  
**AFLT** **TELLALLACLA** **FDVRNP** **LYLFDLVIVLVSLVLEIVL** **EHVGEVQLSA**  
**LSGLLVFA** **RIWR** **FV** **IAHGLATSV** HESEAASHEEITKQAEELHKQVVELR  
AKLAGSARRGLMAR-

Geminigera cryophila HBHS01020640

Teleaulax amphioxeia GKBS01005298



## Discoba - Euglenozoa

Eukaryota; Discoba; Euglenozoa; Euglenida; Spirocuta;  
Euglenophyceae; Euglenales; Euglenaceae; Euglena.

Euglena gracilis comp31701\_c0\_seq1 transcribed RNA sequence.  
GDJR01054876

MSYFDDTFVGGAPAPSVEATKVEDGCPIDCHKLASPSKAPTLRQKVHHFLS  
CRPFKIFMMALLLLDLILVMASVLEETGSLQVSLDECERSIHDCEHICSN  
STDFTATATNYCTNTHGQTCHYNHPSLATALHLAEKVLAYISIGLLSFFL  
LERLVGIIICEGLKFFSCAFKVFDFVVIIVSLVLEILFLGQPGVGLIAIGF  
FWRFFVRIGHGFHEAEELTHPVDEFVKEHKAALFALHRRLLGVPGLYGTEG  
AVLAENAAAVREALALLEQDGFGLLLGIADAAVAGHRQHQEKEQLHYWK  
LQ-

Euglena longa GG0E01032297  
Neobodo designis HBGF01052964

Figure S2. Alignment of H<sub>v</sub>1 and H<sub>v</sub>2 from Xenopus.

|       |     |                                                               |     |
|-------|-----|---------------------------------------------------------------|-----|
| Query | 1   | MAGCLRHTSVGDDTKKREWKEEDVEVAHEEEKKNTPHPFIASYSYSLRGALKWLFSSHKFQ | 60  |
|       |     | MAGCLRHTSVGDDTKKREW+EDVEVA+EE KNTPHPFIASYS RGALKWL SSHKFQ     |     |
| Sbjct | 1   | MAGCLRHTSVGDDTKKREWQEDVEVAYEEPLKNTPHPFIASYSFRGALKWLLSSHKFQ    | 60  |
| Query | 61  | IVIISLVILDALFVLVEVLLDLELLAEKVDHIIPEIFHYLSVSVLSFFILEIAGKLYAFR  | 120 |
|       |     | IVII LVILDALFVLVEVLLDLELLAEKVDHIIPEIFHYLS+SVL+FFILEIAGKLYAFR  |     |
| Sbjct | 61  | IVIICLVILDALFVLVEVLLDLELLAEKVDHIIPEIFHYLSISVLTFFILEIAGKLYAFR  | 120 |
| Query | 121 | LEFFHHKFEVFDAAIVVISFIIDIVYISREDIFNAVGLLILLRLWRVARIVNGVIVSVKS  | 180 |
|       |     | LEFFHHKFEVFDAAIVVISFIIDIVYISREDIFNAVGLLILLRLWRVARIVNGVIVSVK+  |     |
| Sbjct | 121 | LEFFHHKFEVFDAAIVVISFIIDIVYISREDIFNAVGLLILLRLWRVARIVNGVIVSVKT  | 180 |
| Query | 181 | RAEEKIHKLEENQRSLEKVTQLEQQSAQQEQEIARLQKLLKQHNVPFDS             | 230 |
|       |     | RAEEK+HKL+E + SLLEKV QLEQQ AQEQEI RL KLL++HNVFP S             |     |
| Sbjct | 181 | RAEEKMHKLKEQKGSLEKVAQLEQQCAQQEQEIGRLHKLLQEHNVFPAS             | 230 |

Figure S3. Cephalochordata sequences

## Opisthokonta - Animalia - Cephalochordata

Eukaryota; Metazoa; Chordata; Cephalochordata; Leptocardii;  
Amphioxiformes; Branchiostomidae; Branchiostoma.

Branchiostoma belcheri voltage-gated hydrogen channel 1-like  
(LOC109464640), transcript variant X1, misc\_RNA. XR\_002139895

MDKLKNAFKFELFQNDSSSVITSSDATSSSGNAEPKTFREKLLHVLHST  
EFQVAVVILVIVDCILVVFELLIDLGGIKLCEEAVRAECESAGTTATMTP

AEEAEKEAECDHPAPEILHYMSIAILTI FLIEIMFKVYAYQKDYLKHKME  
LFDVVVIISFCFDVAYANHEDAFDGI GLLVVLILWVTIINGILMSVQ  
HTAEKKINAHKQARQEVQEELNKMIAHAHDLEKEIDLLRKT LRENGISVE  
SIPRTPEVSSSQVKVEAEITPTTEYATPAHFSAFSGQDDTQA-

Gene:

Branchiostoma belcheri isolate BF01 breed outbred unplaced genomic scaffold, Haploidv18h27 scaffold1, whole genome shotgun sequence.  
NW\_017802379

**Branchiostoma belcheri uncharacterized LOC109463761  
(LOC109463761), mRNA. XM\_019760615**

MTPCDGEKKPPPSGEATVGGIFPDEIAVIKKQAQNDKRRPLKIVIIAGVA  
VMAVLAIGVLLITRPSRHGVVTC SLNFWTGKQLLHETVETDKDAETDAF  
YTEGSRGEAAVMDHSSMMKAFKLSRSNKTCFIFEETQGEKNAVKKTAEE  
LEEKQDGS LQFAEYGGAMLMTVDTERPARPVLSQKLQNF CGQLEPRWAKL  
TPATEEEQQGDRVEIIMP AEARDMGELAEMPVGP GNEKETPPTPSSTHPL  
TESRDHHHDNQDCRHKLK HMLERQSVHIAIVVLIVLDTLIVIMELLIDVR  
VIKLCPPDPDVCVPKAGHNGTTGLVTTGAPGHHVIDAGDHGTGGHEECHH  
VLIEVLHVVSILILCIFVVEIALKIYVDRLEFFKNGFHVLDVVVLVSLG  
LDIASLV RPSAFTDAGGLLILLWRITRIVNGIISV EEEWEHKVNHLK  
HEHQ LVERERDRLLKENALLQKTLTNHGIDIPKLPPDSGDESTCEFEFE-

Gene:

Branchiostoma belcheri isolate BF01 breed outbred unplaced genomic scaffold, Haploidv18h27 scaffold1, whole genome shotgun sequence.  
NW\_017802379

**Branchiostoma belcheri uncharacterized LOC109467017  
(LOC109467017), transcript variant X1, mRNA. XM\_019764911**

MPRFKGQQQHETCRHLAVEDVMVADELGLGMSSADLYNRNVEGDFLDLE  
AAIFCDIEEEKTKQRVQQLLDGPATQITIVLT SWLLSHVLLL ELLVDLS  
AIFHFDKCMVARI IHVWGLGVLSVFTVEVLTRLVCHQM QFFDKKIEVLDL  
AVVIIACVPMIVSV ELAPSTAWDGFSLVIL IWR CYRVVQGCVSPVRE  
EASRKVHVLLQAQRRAHQELQTL YLMHDENQEEIHRLRLLLGRREAEEDN  
VSQQLQVALERKDSQYVAQLIHTIEQRQGRNKGRQRDGG RDSPYSTIVVH  
AHQLSDSNDVPSGTIASRLSESTTGDSGICEETRPQQQTND ESRNHANSS  
GVTQLPKCGQQALT VVEPRGSHQQHSNRSPCSNSKRNP AVSSCDMDRIDV  
IGSEIILQHRNDSTGKKFLDGKLP SNKDSRLLFRDNKSMPSNGKVSHSKN  
KVSEIKVNKSLDDDHKKAVSMDNKT VSKNNTATAQTNGKVRKGKKKAGSG  
DSYVNGALLLEMT ELQQKGDTGYCNEIVIEQFYQNGNAPATAL-

Gene:

Branchiostoma belcheri isolate BF01 breed outbred unplaced genomic scaffold, Haploidv18h27 scaffold173, whole genome shotgun sequence.  
ACCESSION NW\_017803191

#### Figure S4. Chelicerata sequences

Eukaryota; Metazoa; Ecdysozoa; Arthropoda; **Chelicerata**;  
Merostomata; Xiphosura; Limulidae; Limulus.

## Atlantic horseshoe crab

### Hv1:

**Limulus polyphemus voltage-gated hydrogen channel 1-like**  
(LOC106464594), transcript variant X1, mRNA. XM\_013924749

MEDTTEKTGDSTSIATNLESDPDIQPLITFRERLTKLLHSYKFQVGVITL  
VIVDCLLVISELLVDLNLVSVNSHSSAPHVLHYLSISILSLFIIIEIGAKL  
YAFRLEFFHHKLELFDVIVLVSFALDITFRDKESAVSGVGLLIILRLWR  
VARVLNGIVLSVKTQADHKLAKEQKKRENLEQELARSRDYIAALEEEVET  
LRRILKDNNIKELPPTVIDNGAFKCTTLNVVAEVDNHMIT-

Gene:

Limulus polyphemus unplaced genomic scaffold, Limulus\_polyphemus-2.1.2  
Scaffold1698 Sequence ID: NW\_013667308.1

### Hv2:

**Limulus polyphemus transmembrane protein 266-like**  
(LOC106463214), mRNA. XM\_022390662

MRNSDPLVWGLTGDTSLDDGPTLCEKIWATVNGKVFSAVIVTLVVFVEG  
LVIFSELLIDFEVVQDPQWKTSLNCSANVSGLVFSSAGANSPKLMAKDI  
LSYISIVILIIIFVFEVGFRLVSGRARYLIQGMEICDAIVVLVAFGLDIAF  
LTPPSKKGAGKEAAVLIILLRLWRILQSVI DNTRLEMGHFLSICERE  
KIQAEHKVDILILKVEDLEHEVAYLKEKLKKTEKESLYAKRQRKKDGYSS  
TQHKHPTITIGVETSPARHPCTGTQTAIVICEQHIPEEKVTKEQVMDMRT  
FADVTSTRIIADALCMVTGNPNQFLRSPTTGGSTVKDGTTSHCRIAGDFE  
SGYISNVSGITWDKAASRIPTLGTTRTLKCPESPESGYGSSSSARNPAA  
SSVSPLDTGTETASTSTGSSKHTDTVFLFPDPTGQRREVELGVEMDILEE  
ISEIERVKHIEFDPNKQDQDIPMTSL-

Gene:

Limulus polyphemus unplaced genomic scaffold, Limulus\_polyphemus-2.1.2  
Scaffold1350 Sequence ID: NW\_013666960.1

### Hv3:

**Limulus polyphemus uncharacterized LOC111087200**  
(LOC111087200), transcript variant X1, mRNA. XM\_022393049

MRNFSMFFNSKEELMRNSEPLVWSLTGDESLDDDDSTRLCERIWVSVNGK  
VFNAVIVTMVFEGLVVFSELLIDFEIVQDPHWKTIRNCSANVPALIFPS  
SEAVSPNLRNTKDVLSYISIVILIIIFVFEIGCRLAVGRAKYLIQGIEICD  
AAVVLVAFGLDIAFLTTPPSKKGAGKEAAVLIILLRLWRILQSVIDKT  
RVEMGHFLSICEREKAQAEQKVDILILKVEDLEHEVAYLKEKLKKSEKES  
LCAKRQRKKEGYSGIQKHPKITVGVETSPARHPCTGTQTARAICEGFIL  
DEKATKRKVMIDITFAEITATRIIAKALCVASPDGQYVRFLATKDAVGI  
SGTTLCCRIDGSFESGYGSNTSGMTLDKTTNCIPSVGIRRTVKCPESP  
SGYGSSSSARNTVATSVSPLDIEMETTSVSTGSKQTDTVFLFPDSANQC  
RKAERGVMEDILEELSEIERIKQVEFDPNKQDEEDIPMTSL-

Gene:

Limulus polyphemus unplaced genomic scaffold, Limulus\_polyphemus-2.1.2  
Scaffold1865 Sequence ID: NW\_013667475.1

**Figure S5.** Sequence alignment of two putative *Oikopleura dioica* Hv channels with *Ciona intestinalis* Hv1

|                  |                                                             |
|------------------|-------------------------------------------------------------|
|                  | ..... ..... ..... ..... ..... ..... ..... ..... ..... ..... |
|                  | 10 20 30 40 50                                              |
| <b>CiintHv1</b>  | MEGDNCNKSR HKSHNMINPN YASVRCTQPL PSVIQLRSRN KMIGITEDPS      |
| <b>OidioHvL1</b> | -----                                                       |
| <b>OidioHvL2</b> | -----                                                       |
|                  | ..... ..... ..... ..... ..... ..... ..... ..... ..... ..... |
|                  | 60 70 80 90 100                                             |
| <b>CiintHv1</b>  | SDSEPVSNNQ PLLLTNLSYE VHTFNDNNNH ERPAPQEQST QNTMISMQSE      |
| <b>OidioHvL1</b> | -----MS                                                     |
| <b>OidioHvL2</b> | -----MD                                                     |
|                  | ..... ..... ..... ..... ..... ..... ..... ..... ..... ..... |
|                  | 110 120 130 140 150                                         |
| <b>CiintHv1</b>  | QKSDRFTASN LGMFQYMKFE IGEDGDDHEE EAILTNREKL RHILHSPKPIH     |
| <b>OidioHvL1</b> | ENSSVVESTP ----- -FLEILKSDM TCWEKTSRVV HKLLHSHTTQ           |
| <b>OidioHvL2</b> | NRISKFFSS- ----- ---DTEAYLE RTPVTISEKI AHFLHSSTCH           |
|                  | ..... ..... ..... ..... ..... ..... ..... ..... ..... ..... |
|                  | 160 170 180 190 200                                         |
| <b>CiintHv1</b>  | VAIIIVLVVLD SFLVVGELLI DLKVIIVPHG -----                     |
| <b>OidioHvL1</b> | AILLFLVLVD CAVIACEIVF DEKVKTHNDY CGANSTLCQE EIDNEQTKKW      |
| <b>OidioHvL2</b> | LIVIVLVVLD CAFVLTELIF DGKLDTYAEY C---DPTPSC SEQSHKLHHW      |
|                  | ..... ..... ..... ..... ..... ..... ..... ..... ..... ..... |
|                  | 210 220 230 240 250                                         |
| <b>CiintHv1</b>  | NPAPFILHGF SLSILSIFMV EIALKIIADH RHFIHHKVEV LDAVVVVISE      |
| <b>OidioHvL1</b> | KKIYKALYYT SLTLLSVFV VEFILKIVFSA KKFLKSWVHI FDALIVISSW      |
| <b>OidioHvL2</b> | EHVTHVIHIC SIIVLTIFMI EVILKVIYTR EHFFSHKIEI IDGVVVLVLSW     |
|                  | ..... ..... ..... ..... ..... ..... ..... ..... ..... ..... |
|                  | 260 270 280 290 300                                         |
| <b>CiintHv1</b>  | GVDIALIFVGES-EALAAIG LLV---ILRLVVFRIINGIIVTVKTKADDRVH       |
| <b>OidioHvL1</b> | ILMLIMLNKDVKNGMIAEFL IAF-----FVIFLIHGMKEALEEANELLHE         |
| <b>OidioHvL2</b> | ILDLIMLNP NLV-GKWAEFI IIF-----FFLFLINGMILSAKQAADKRVH        |
| <b>CiintVSP</b>  | VVTIFYTVLDEYVQETGADG LGRLVVVLARLLRVVVLARIFYSHQQMKASSRRT     |
|                  | ..... ..... ..... ..... ..... ..... ..... ..... ..... ..... |
|                  | 260 270 280 290 300                                         |
| <b>CiintHv1</b>  | GVDIALIFV GES-EALAAI GLLVILRLWR VFRIIN--GI IVTVKTKADD       |
| <b>CiintVOSP</b> | VVTIFYTVL DEYVQETGAD GLGRLVVLAR LLRVVRLARI FYSHQQMKAS       |
| <b>OidioHvL1</b> | ILMLIMLNK DVKNGMIAEF -----LIAFR VIRLIH--GM KEALEEANEL       |
| <b>OidioHvL2</b> | ILDLIMLNP NLV-GKWAEF -----IIIFR FLRLIN--GM ILSAKQAADK       |
|                  | ..... ..... ..... ..... ..... ..... ..... ..... ..... ..... |
|                  | 310 320 330 340 350                                         |
| <b>CiintHv1</b>  | EIKKKNSELE LQIHNLEEKL SQKEQDMSRL HEILRCNNID IPPTVPLTTS      |
| <b>OidioHvL1</b> | NMEEEIHALK AENNNKKEEL LAVKDR-----                           |
| <b>OidioHvL2</b> | EQKRKVQELE KELVDLKKQY ETQNNQ-----                           |

.....|.....|.....  
360  
CiintHv1 VQIHSTTTAS ADV-  
OidioHvL1 -----  
OidioHvL2 -----

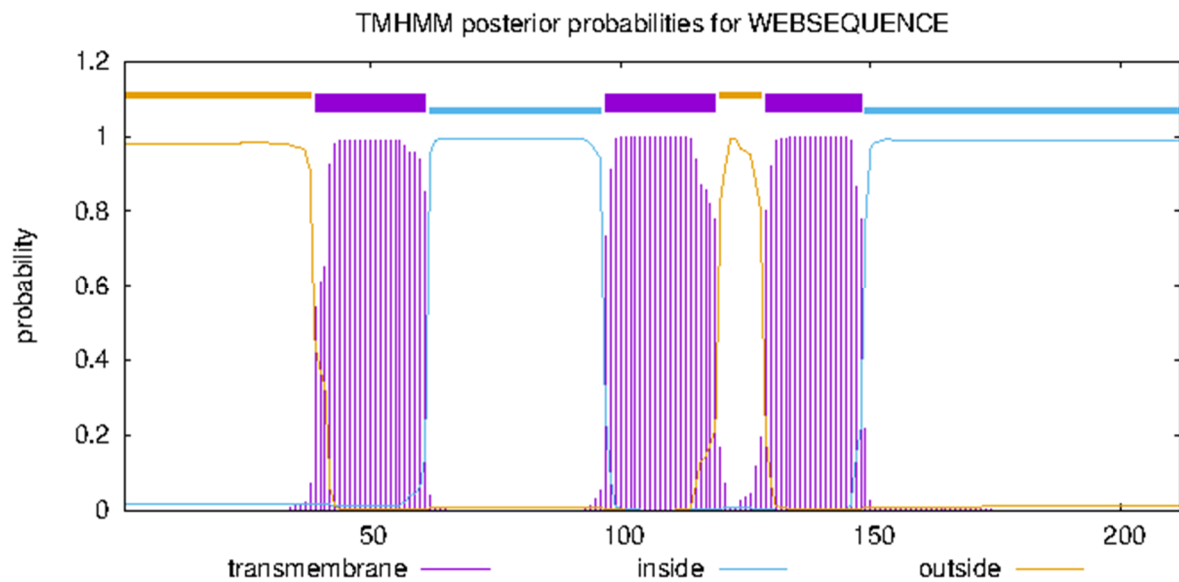

Transmembrane prediction using TMHMM of *Oikopleura dioica* sequences identified only three transmembrane spanning segments.

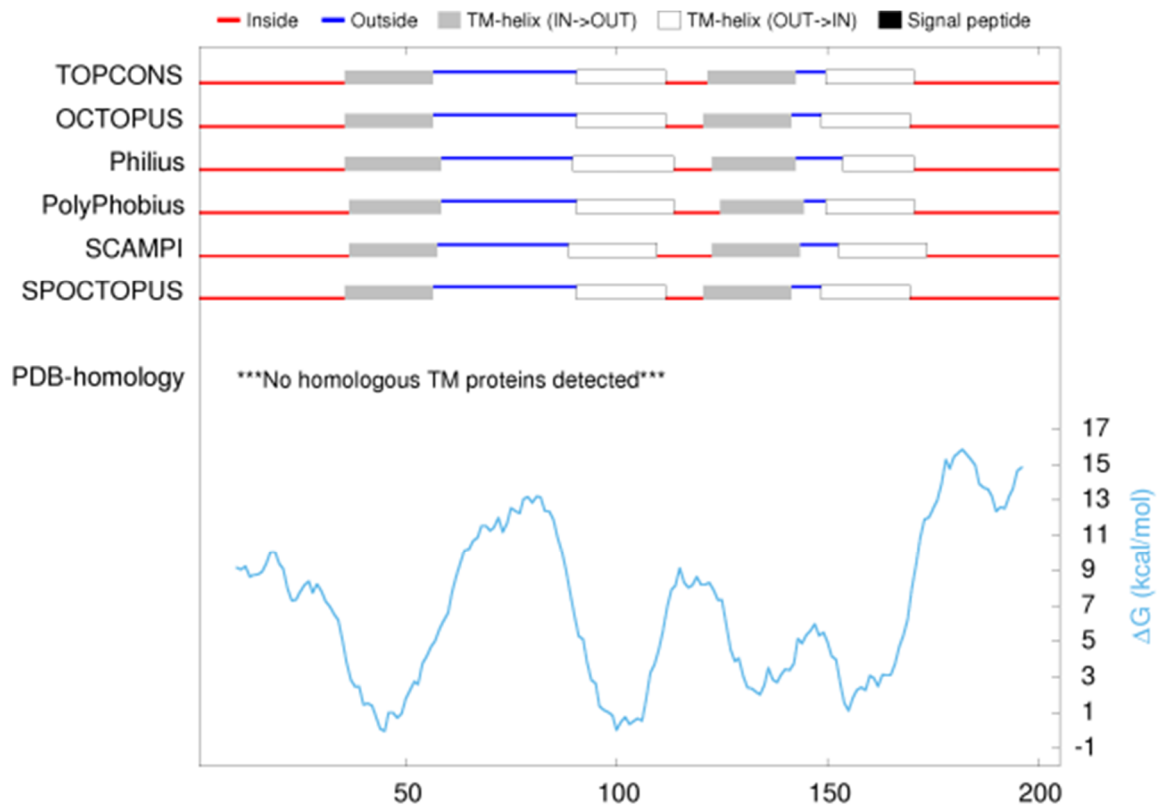

[High-resolution image](#)

Consensus prediction (TOPCONS):

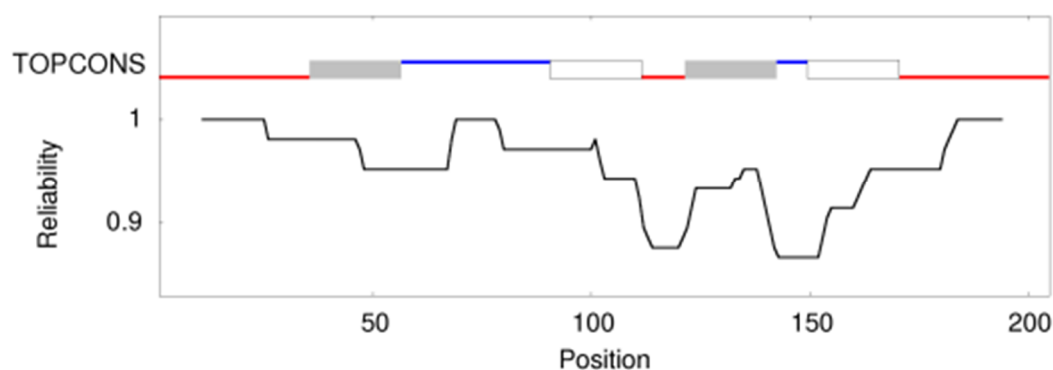

[High-resolution image](#)

Predicted signal peptide and TM-helix positions (position starting from 1):

|              |                                                                                 |
|--------------|---------------------------------------------------------------------------------|
| TOPCONS      | <b>TM1:</b> 36-56, <b>TM2:</b> 91-111, <b>TM3:</b> 122-142, <b>TM4:</b> 150-170 |
| OCTOPUS      | <b>TM1:</b> 36-56, <b>TM2:</b> 91-111, <b>TM3:</b> 121-141, <b>TM4:</b> 149-169 |
| Philius      | <b>TM1:</b> 36-58, <b>TM2:</b> 90-113, <b>TM3:</b> 123-142, <b>TM4:</b> 154-170 |
| PolyPhobius  | <b>TM1:</b> 37-58, <b>TM2:</b> 91-113, <b>TM3:</b> 125-144, <b>TM4:</b> 150-170 |
| SCAMPI       | <b>TM1:</b> 37-57, <b>TM2:</b> 89-109, <b>TM3:</b> 123-143, <b>TM4:</b> 153-173 |
| SPOCTOPUS    | <b>TM1:</b> 36-56, <b>TM2:</b> 91-111, <b>TM3:</b> 121-141, <b>TM4:</b> 149-169 |
| PDB-homology | ***No homologous TM proteins detected***                                        |

Sequence and predicted topologies: (i: inside the membrane, o: outside of the membrane, M: membrane region, u: non-membrane region but location unknown)

|              |     |             |              |              |              |              |     |
|--------------|-----|-------------|--------------|--------------|--------------|--------------|-----|
| Seq.         | 1   | MDNRISKFFS  | SDTEAYLERT   | PVTISEKIAH   | FLHSSTCHLI   | VIVLVLVDC    | 41  |
| TOPCONS      |     | iiiiiiiiiii | iiiiiiiiiii  | iiiiiiiiiii  | iiiiiiMMMM   | MMMMMMMMMM   |     |
| OCTOPUS      |     | iiiiiiiiiii | iiiiiiiiiii  | iiiiiiiiiii  | iiiiiiMMMM   | MMMMMMMMMM   |     |
| Philius      |     | iiiiiiiiiii | iiiiiiiiiii  | iiiiiiiiiii  | iiiiiiMMMM   | MMMMMMMMMM   |     |
| PolyPhobius  |     | iiiiiiiiiii | iiiiiiiiiii  | iiiiiiiiiii  | iiiiiiMMMM   | MMMMMMMMMM   |     |
| SCAMPI       |     | iiiiiiiiiii | iiiiiiiiiii  | iiiiiiiiiii  | iiiiiiMMMM   | MMMMMMMMMM   |     |
| SPOCTOPUS    |     | iiiiiiiiiii | iiiiiiiiiii  | iiiiiiiiiii  | iiiiiiMMMM   | MMMMMMMMMM   |     |
| PDB-homology |     |             |              |              |              |              |     |
| Seq.         | 51  | FVLTELIFDG  | KLDTYAEYCD   | PTPSCSEQSH   | KLHHWEHVTH   | VIHICSIIVL   | 91  |
| TOPCONS      |     | MMMMMMoooo  | oooooooooooo | oooooooooooo | oooooooooooo | MMMMMMMMMM   |     |
| OCTOPUS      |     | MMMMMMoooo  | oooooooooooo | oooooooooooo | oooooooooooo | MMMMMMMMMM   |     |
| Philius      |     | MMMMMMMMMo  | oooooooooooo | oooooooooooo | oooooooooooo | MMMMMMMMMM   |     |
| PolyPhobius  |     | MMMMMMMMMo  | oooooooooooo | oooooooooooo | oooooooooooo | MMMMMMMMMM   |     |
| SCAMPI       |     | MMMMMMMMMo  | oooooooooooo | oooooooooooo | oooooooooooo | MMMMMMMMMM   |     |
| SPOCTOPUS    |     | MMMMMMoooo  | oooooooooooo | oooooooooooo | oooooooooooo | MMMMMMMMMM   |     |
| PDB-homology |     |             |              |              |              |              |     |
| Seq.         | 101 | TIFMIEVILK  | VIYTREHFFS   | HKIEMIDGVV   | VLLSWILDLI   | MLNPNLVGKW   | 141 |
| TOPCONS      |     | MMMMMMMMMM  | Miiiiiiiiii  | iMMMMMMMMM   | MMMMMMMMMM   | MMooooooooM  |     |
| OCTOPUS      |     | MMMMMMMMMM  | Miiiiiiiiii  | MMMMMMMMMM   | MMMMMMMMMM   | MoooooooooMM |     |
| Philius      |     | MMMMMMMMMM  | MMiiiiiiiiii | iMMMMMMMMM   | MMMMMMMMMM   | MMoooooooooo |     |
| PolyPhobius  |     | MMMMMMMMMM  | MMiiiiiiiiii | iiiiiiMMMMM  | MMMMMMMMMM   | MMMMMooooooM |     |
| SCAMPI       |     | MMMMMMMMMM  | iiiiiiiiiii  | iMMMMMMMMM   | MMMMMMMMMM   | MMMoooooooo  |     |



|       |            |            |            |            |            |
|-------|------------|------------|------------|------------|------------|
| amHv1 | TRRSSMDDQL | PADELKEMGQ | PGTTAAVMAS | TVCLTEDDTE | CPANKNHREK |
| kvHv1 | LHHAVHTVHT | SKSARDAEG- | -----      | -----      | ---HGTWQSK |
| kvHv2 | RTASATGTKK | SKIRRIVP-- | -----      | -----HIL   | DEISHEATHF |
| ehHv1 | EAAGASEVTS | PKTRYGARAF | GKPLKAQLLS | ARAEVEKAHA | EHGADSWQRR |
| ehHv2 | QRRGAKWVSA | DSEARALS-- | -----      | -----S     | RRGSYAWQTK |
| egHv1 | DDTFVGAPAP | SVEATKVEDG | CP-----    | --IDCHKLAS | PSKAPTLRQK |

|       |            |             |             |            |            |
|-------|------------|-------------|-------------|------------|------------|
|       | .... ....  | .... ....   | .... ....   | .... ....  | .... ....  |
|       | 160        | 170         | 180         | 190        | 200        |
| hsHv1 | LRKLFSSHRF | QVIIICLVVL  | DALLVLAELI  | ID-----    | -----      |
| ciHv1 | LRHILHSPKI | HVAIIVLVVL  | DSFLVVGELL  | ID-----    | -----      |
| npHv1 | LRKLLHSHKF | QISVITLVII  | DCLLVITELL  | ID-----    | -----      |
| etHv1 | AKLLLESPPK | HIVVLTLVII  | ELTMVVAELM  | ID-----    | -----      |
| spHv1 | LHEIMETQKF | HIAILVLVVI  | DCILVIVELV  | IDFEVLSANN | HVPEAGCAHP |
| acHv1 | LDDVIHSQKF | MVFIIIVLVVL | DCLMVIAELL  | FD-----    | -----      |
| acHv2 | LAAFLKTNLV | QYSIIALVIL  | DCLIIVMELL  | IDMNIIVFPE | DDPHHPPGEG |
| cgHv4 | MRKVFHNPIT | HLIIIAFIVL  | DIAILLVVLL  | VDINVIQVRA | ETEED----- |
| aoHv1 | ARDFLSSRRG | HYLVLLLVSV  | DVACTFADFL  | IELHVCELT- | -----      |
| amHv1 | LNELLHGDKI | QYAIVVLVII  | DIIIVIAELV  | ID-----    | -----      |
| kvHv1 | LNEALNSSKV | HTILNVLLIC  | DLMTVIIIGML | LEQYYSDSQV | QGLTEAFKDC |
| kvHv2 | RRLLLHSPKV | HFTILVLLIA  | DGLICLTCGV  | LEAHYLGKKS | DDCQNYVNKC |
| ehHv1 | CLHLLHSHRV | QLFFILLLLV  | DMLIVITEIC  | LDLEYPSCLR | AKRDTVSCCA |
| ehHv2 | LLAFLHSPRL | QALLTLLLV   | DVIAVFGELF  | IDAEFPSCMY | VLRDAIPCCD |
| egHv1 | VHHFLSCRPF | KIFMMALLLL  | DLILVMASVL  | LETGSLQVSL | DECERSIHDC |

|       |            |            |            |            |            |
|-------|------------|------------|------------|------------|------------|
|       | .... ....  | .... ....  | .... ....  | .... ....  | .... ....  |
|       | 210        | 220        | 230        | 240        | 250        |
| hsHv1 | -----      | -----      | -----      | -----      | -----      |
| ciHv1 | -----      | -----      | -----      | -----      | -----      |
| npHv1 | -----      | -----      | -----      | -----      | -----      |
| etHv1 | -----      | -----      | -----      | -----      | -----      |
| spHv1 | QE-----    | -----      | -----      | -----      | -----      |
| acHv1 | -----      | -----      | -----      | -----      | -----      |
| acHv2 | SSHHPVAFAS | RSSNLTGDNH | TVYPAHHIH- | -----      | THHDNSSNLT |
| cgHv4 | -----      | -----      | -----      | -----      | -----      |
| aoHv1 | -----      | -----      | -----      | -----      | -----      |
| amHv1 | -----      | -----      | -----      | -----      | -----      |
| kvHv1 | LEKRTFCP-- | -----      | -----      | -----      | -----      |
| kvHv2 | --100aa--  | -----      | -----      | -----      | -----      |
| ehHv1 | AGEEGEHHTL | RYLAEEHGG  | HHSLCG---- | -----      | -----KG    |
| ehHv2 | SGCIGAGDYS | AAAAADAIQT | ILSLGKSVQG | DLHLEHDETR | AEICAGQGHS |
| egHv1 | EHICSNSTDF | TATATNYCTN | THG-----   | -----      | -----      |

|       |            |             |             |            |            |
|-------|------------|-------------|-------------|------------|------------|
|       | .... ....  | .... ....   | .... ....   | .... ....  | .... ....  |
|       | 260        | 270         | 280         | 290        | 300        |
| hsHv1 | -----L     | KIIQPDKNY   | AAMVFHYMSI  | TILVFFMMEI | IFKLFVFRL- |
| ciHv1 | -----L     | KVIIIVPHGNP | APEILHGFSL  | SILSIFMVEI | ALKIIADHR- |
| npHv1 | -----LE    | MH---EEESL  | AQHVLHYCSI  | TILSIFIVEI | FLKLYAFRQ- |
| etHv1 | -----AS    | GVEKSEALET  | VEIALKFISI  | SILSIFVIEN | LFTMYVLR-  |
| spHv1 | ---EGQC    | ETDKEEKEVT  | AANVLHYISI  | GILSIFMIEL | LKIPVFRM-  |
| acHv1 | -----LE    | IVKLGEHHY   | IPKIFHYGSL  | GILSLFLIEI | GLRIFVLR-  |
| acHv2 | MYGNDSAHAA | PVHHHTNKEK  | AEHVLHALSL  | TILSIFMVEV | CVKIYVEGK- |
| cgHv4 | -----      | ---EEHLREE  | LEDGLHYAAL  | TIISLFVVEV | VIKIYIEGK- |
| aoHv1 | -----KH    | GSHVAIGWGV  | TQKVLAIIVGL | VFSCLFMLEL | MVTVFSFGK- |
| amHv1 | -----L     | RAGSEHHDNS  | ASHVLHYISI  | AILSVFMIEL | LLKIYAMGF- |
| kvHv1 | -----DPSHL | AHYGNHDLHE  | WAERMEYASL  | AILLIFLLEN | MLLVLANGC- |
| kvHv2 | ----GECAGH | PHFGDHTLHD  | IEIILAYISV  | GILSLFLVEQ | VLLIVDLGK- |
| ehHv1 | TVEGPHGVGC | DEHAHPAVHT  | AHAVLTWASV  | AILSLFEIEL | LTLAASGLR  |
| ehHv2 | HLDSTGRIGC | DSHKHDLAHK  | FHKFLFRVSL  | TVLVVFELEL | LGLIASLDR- |
| egHv1 | ----QTCHYN | HPSLATALHL  | AEKVLAYISI  | GLLSFFLLER | LVGIICEGL- |



```

.....|.....| .....|.....| .....|.....| .....|.....| .....|.....|
          310          320          330          340          350
hsHv1  EFFHHKFEIL DAVVVVVSFI LDIVLLFQ-- -EHQFEALGL LILLFLWFWA
ciHv1  HFIHHKVEVL DAVVVVISFG VDIALIFVGE -SEALAAIGL LVILFLWFWF
npHv1  EFFKHRLEVF DAIIVIVSFA LDIAFRNS-- -RDALSGVGL IILFLWFWA
etHv1  EFFHKCLEVF DSIVIFTSLV LEVIFLNH-- -HDAATGVGI LIGFLWFWIV
spHv1  EFFRSKLEVF DGIIIVISFV LDVVSLIY-- -EEQFAVLQL LVLLFLWFWIV
acHv1  DFFKHKLELF DAVVVIVSFI LDIVFRDN-- -EDAATGVGL LIILFLWFWT
acHv2  HMLKQKAEVF DAIVVIVSFT LDITFSFVSV SKAASEAAGL MVILFLWFWT
cgHv4  HFFSDKWEVF DAIVIFVTFG LDLALAFSPV SSAVRDSVAL LVFLFLWFWV
aoHv1  GYFSSKFHVF DALVIIVAFG VDVALHGI-- ---EEELGSL IVVLFLWFWF
amHv1  TFFKHKMEVF DGFVIIVSFA LDIAFSNE-- -QGGVDGVSL IVLLFLWFWT
kvHv1  RFFANPFHIL DIVVVVSVSG FELQGILG-- -EGHDAGIGL VVFARTWFFI
kvHv2  -EYLKPMFIL DFVVIVSSLL IEILVVNM-- -----TIGGL LVLAFTWFFA
ehHv1  DFFSNVYYVL DIVIVSASLV LECVFYNT-- -AGLSDLIGL VMFLFLWFL
ehHv2  AFFRNPLYVL DLIVITVSLG LETVFRVFS- -MPEQDLAMA LIIVFLWFEV
egHv1  KFFSCAFKVF DFVVIIVSLV LEILFLGQ-- -----PGVGL IAIGFTWFEV

```

```

.....|.....| .....|.....| .....|.....| .....|.....| .....|.....|
          360          370          380          390          400
hsHv1  RIINGIIISV KTRSERQLLR LKQMNVLAA KIQHLEFS-C SEKEQEIERL
ciHv1  RIINGIIIVTV KTKADDRVHE IKKKNSELEL QIHNLEEK-L SQKEQDMSRL
npHv1  RVLNGVVLVS KMQAQEHQLER EKQRGMALEG ELSRCRQV-C AAQQRELDVL
etHv1  RVINGIAVTV AAQSEKKLEE EKDLREEIEM ELNKCVD-RS KKQQCYILFL
spHv1  RVVNGVILSV ETQAKKKIEQ QKHLRAEVEH EMEKFRRY-C AAQEKEIEVL
acHv1  RIVNGIVLSV QKQAEKKIER EKHLREECEQ ELAKFREY-C MAQAEIEVL
acHv2  RIINGVIMSV KLDANKKMEV HKKARRKLER ENKRLQAK-I ERLEREVATL
cgHv4  KIMTEIQYCV RREVPEAIDK EKLAQEKADW LARRQGHT-K V-----
aoHv1  KIIEELQSAN EDTLEEYEHE IERLRQENTY LRQRLNVS-L SNADPMD---
amHv1  RIVNGIILSV QMRAEKKVQA VMKENAELQK ELEQLKSK-C AQLESELTTL
kvHv1  RLGHGIHEMH EEHEAEDHGE HRVSDAAGSL EAPLQKGS-F EQHAKGTSGV
kvHv2  RVGHGVFEAK EMIEEMIGED DDTVKNMMDA WKELTPERWE EILHSGSAEI
ehHv1  RIGHAMFAST ERASSTDNLK EVVRELRAEL DLLSEWAE-- ---EEERASA
ehHv2  RIGHGIFAST HSVAKEKSDK LHAEIRALEE EYTRALNQAA SLATTTRPTR
egHv1  RIGHGFHEAE ELTHPVDEFV KEHKAALFAL HRRLLGVPGL YGTEGAVLAE

```

```

.....|.....| .....|.....| .....|.....| .....|.....| .....|.....|
          410          420          430          440          450
hsHv1  NKLLRQHGLL GEVN----- - - - - -
ciHv1  HEILRCNNID IPPTVPLTTS VQIHSTTTAS ADV----- - - - - -
npHv1  RAVLQHHGLD QQLPDGNR-- - - - - -VDVV ADVEKR---- - - - - -
etHv1  QKFIQSNGLE IPPHSSCPSR - - - - - ---NSSEGH- - - - -
spHv1  RNTLNQHGIQ IDDDYVAKKP QFSLNQLNVV VEMNSADKHD TGEDEGE GEE
acHv1  QGLLHKHNIE FTTNKITRPE --SRVQVDVV AEVNSMTAVA ETDIPLSPSQ
acHv2  KQKMATSSTP QMSFEMQSGL SVERSPSGEM RENSAQV--- - - - - -
amHv1  KQS----- - - - - -
kvHv1  HHARSQASSN REGREGCCVQ - - - - -
kvHv2  LRESGVTPAE IKLGEALGNS PAVAMRALAF ARGWKQKLDK KKAKRLSGSN
ehHv1  RAPPDDPGVD DIG----- - - - - -
ehHv2  LASAPSSTSG SPSATRPPPF RGRSASEASA ATHDLQGAGG EKLADGVAAA
egHv1  NAAAVREALA LLEQDGFGG L LGIADAABA GHRQHQEKEQ LHYWKLQ---

```

```

.....|.....| .....|.....| .....|.....| .....|.....| .....|.....|

```

|              |            |            |            |            |            |
|--------------|------------|------------|------------|------------|------------|
|              | 460        | 470        | 480        | 490        | 500        |
| <b>spHv1</b> | GGGDGNTRRH | EKEREALGEH | TITLTTDDNV | NTIQADYHPQ | DTTFT----- |
| <b>acHv1</b> | PGEQEISLSS | GDNVTDVAVV | V-----     | -----      | -----      |
| <b>kvHv2</b> | PKRQMPGASL | QTTATVGKGH | SEH-----   | -----      | -----      |
| <b>ehHv2</b> | LSQRSNTPTS | PVGAPAMRRP | PAAAPLGAAH | RALQLGPSSS | AARTGMPGVG |

  

|              |            |            |            |            |       |
|--------------|------------|------------|------------|------------|-------|
|              | .... ....  | .... ....  | .... ....  | .... ....  | ....  |
|              | 510        | 520        | 530        | 540        |       |
| <b>ehHv2</b> | TRMGAGEAAA | AERQAPPAAE | PEPAEGAAAA | ESVELELDAL | DMST- |

Hv sequences were used from *Homo sapiens* (hsHv1, NM\_001040107, Ramsey et al. 2006), *Ciona intestinalis* (ciHv1, NM\_001078469, Sasaki et al. 2006), *Nicoletia phytophila* (npHv1, KT780722, Chaves et al. 2016), *Extatosoma tiaratum* (etHv1, GAWG01024136, Chaves et al. 2022), *Strongylocentrotus purpuratus* (spHv1, XM\_030990962, Sakata et al. 2016), *Aplysia californica* (acHv1 & acHv2, XM\_005100609 & XM\_005093050, Chaves et al. 2023a), *Crassostrea gigas* (cgHv1, XM\_011429833, Chaves et al. 2023b), *Aspergillus oryzae* (aoHv1, XM\_001825513, Zhao & Tombola 2021), *Acropora millepora* (amHv1, MZ029046, Rangel-Yescas et al. 2021), *Karlodinium veneficum* (kvHv1 & kvHv2, JN255155 & HBOS01067516, Smith et al. 2011), *Emiliana huxleyi* (ehHv1 & ehHv2, HBNU01018021 & GIZZ01010784, Taylor et al. 2011), *Euglena gracilis* (egHv1, GDJR01054876). Transmembrane regions are shown in yellow, the totally conserved tryptophan residue within S4 in red, selectivity filter residues in light (D) or dark (E)purple, voltage-sensor positively charged residues in dark (R) or light (K)blue.
